# Structure of intact human MCU supercomplex with the auxiliary MICU subunits

Wei Zhuo<sup>1,\*,†</sup>, Heng Zhou<sup>1,\*</sup>, Runyu Guo<sup>1,\*</sup>, Jingbo Yi<sup>1,\*</sup>, Lei Yu<sup>1</sup>, Yinqiang Sui<sup>2</sup>, Laixing Zhang<sup>1</sup>,  
Wenwen Zeng<sup>2</sup>, Peiyi Wang<sup>3,†</sup>, Maojun Yang<sup>1,†</sup>

<sup>1</sup>Ministry of Education Key Laboratory of Protein Science, Tsinghua-Peking Joint Center for Life Sciences, Beijing Advanced Innovation Center for Structural Biology, School of Life Sciences, Tsinghua University, Beijing 100084, China.

<sup>2</sup>Institute for Immunology and School of Medicine, Tsinghua-Peking Center for Life Sciences, Tsinghua University, Beijing 100084, China; Beijing Key Laboratory for Immunological Research on Chronic Diseases, Beijing 100084, China.

<sup>3</sup>Cryo-EM Facility Center, Southern University of Science & Technology, Shenzhen, 518055, China.

† Correspondence to: [maojunyang@tsinghua.edu.cn](mailto:maojunyang@tsinghua.edu.cn);

[wangpy@sustc.edu.cn](mailto:wangpy@sustc.edu.cn);

[zhuowei@tsinghua.edu.cn](mailto:zhuowei@tsinghua.edu.cn)

\*These authors contribute equally to this work.

Running Title: Cryo-EM structure of intact human MCU supercomplex

*This Paper is submitted back-to-back with the following paper:*

V. Garg et al., The Mechanism of MICU-Dependent Gating of the Mitochondrial Ca<sup>2+</sup> Uniporter. bioRxiv 2020.04.04.025833; doi: <https://doi.org/10.1101/2020.04.04.025833>

29 **Abstract**

30 The mitochondrial  $\text{Ca}^{2+}$  uniporter (MCU) supercomplex is essential for mitochondrial  $\text{Ca}^{2+}$  uptake.  
31 Here, we present high-resolution cryo-EM structures of human MCU-EMRE supercomplex (MES,  
32 3.41 Å) and MCU-EMRE-MICU1-MICU2 supercomplex (MEMMS, 3.64 Å). MES adopts a V-  
33 shaped dimer architecture comprising two hetero-octamers, and a pair of MICU1-MICU2 hetero-  
34 dimers form a bridge across the two halves of MES to constitute an O-shaped architecture of MEMMS.  
35 The MES and MEMMS pore profiles are almost identical, with  $\text{Ca}^{2+}$  in the selectivity filters and no  
36 obstructions, indicating both channels are conductive. Contrary to the current model in which MICUs  
37 block the MCU pore, MICU1-MICU2 dimers are located on the periphery of the MCU pores and do  
38 not occlude them. However, MICU1-MICU2 dimers may modulate MCU gating by affecting the  
39 matrix gate through the EMRE lever.

40

41

42

43

## 44 **Introduction**

45 Mitochondrial  $\text{Ca}^{2+}$  homeostasis regulates energy production, cell division, and cell death. The basic  
46 properties of mitochondrial  $\text{Ca}^{2+}$  uptake have been firmly established (1-4). The  $\text{Ca}^{2+}$  influx is  
47 mediated by MCU, driven by membrane potential and using a uniporter mechanism ( $\text{Ca}^{2+}$  transport is  
48 not coupled to transport of any other ion) (5). Patch-clamp analysis of MCU currents demonstrated  
49 that MCU is a channel with exceptionally high  $\text{Ca}^{2+}$  selectivity (6). Further,  $\text{Ca}^{2+}$  efflux is known to  
50 involve two pathways:  $\text{H}^+/\text{Ca}^{2+}$  exchange (7) and  $\text{Na}^+/\text{Ca}^{2+}$  exchange (8). The homeostasis of  
51 mitochondrial  $\text{Ca}^{2+}$  must be exquisitely regulated to prevent wastage of energy from bidirectional  $\text{Ca}^{2+}$   
52 flux (9-11).

53 In 2010, an RNA silencing study highlighted that MICU1 (mitochondrial  $\text{Ca}^{2+}$  uptake 1) represents the  
54 founding member of a set of proteins required for high-capacity mitochondrial  $\text{Ca}^{2+}$  uptake (12). In  
55 2011, two groups independently reported the membrane protein MCU and proposed it as the pore-  
56 forming element of the long-sought mitochondrial  $\text{Ca}^{2+}$  uniporter (13, 14), which was confirmed later  
57 using whole-mitoplast voltage-clamping (15). In 2012, a paralog of MICU1, MICU2 (mitochondrial  
58  $\text{Ca}^{2+}$  uptake 2), was shown to cooperatively regulate  $\text{Ca}^{2+}$  uptake with MICU1 (16). In 2013, a genetic  
59 study led to the characterization of MCUB (mitochondrial  $\text{Ca}^{2+}$  uniporter b), a vertebrate specific  
60 protein sharing ~ 50% sequence identity and the same membrane topology with MCU (17). Also in  
61 2013, a previously uncharacterized protein, EMRE (essential MCU regulator), which was shown to be  
62 essential for  $\text{Ca}^{2+}$  uptake in metazoa, was affinity-purified from human cells in complex with MCU  
63 (18).

64 Even in the absence of structural data on the MCU complex, mitochondrial  $\text{Ca}^{2+}$  uptake and its  
65 regulation in mammals has been assumed to rely on a complex comprising MCU, EMRE, MICU1,  
66 and MICU2 (10, 19-21). Previous models generally believe that MICU1 and MICU2 form a cap to  
67 occlude the MCU channel in low  $[\text{Ca}^{2+}]$  conditions, and when  $[\text{Ca}^{2+}]$  is elevated, through  
68 conformational changes of the EF hands in these two regulators, they will depart from the MCU/EMRE  
69 pore to allow  $\text{Ca}^{2+}$  permeation (22, 23).

70 Several MCU structures from fungi and an MCU-EMRE supercomplex (MES) structure from human  
71 have been solved lately (24-28), however, no intact structure of the MCU-EMRE-MICU1-MICU2  
72 supercomplex (MEMMS) has been reported. In the present study, after extensive optimization of

73 expression and purification steps, we obtained the high-resolution cryo-EM structures of the human  
74 MES and MEMMS. The pore profiles of both structures are almost identical.  $\text{Ca}^{2+}$  is bound in the  
75 selectivity filter of both MES and MEMMS, and there is no pore obstruction in either of the structures.  
76 Therefore, we propose that both structures are in a conductive conformation. The MEMMS structure  
77 clearly demonstrates how MICU1 and MICU2 bind to MES. The two regulators apparently do not  
78 occlude the MCU channel. Instead, they form a bridge linking the two MCU pores through direct  
79 interactions with EMRE subunits. This finding is in striking contract to the generally accepted model  
80 in which MICUs cap and occlude the MCU channel on its cytosolic side. The accompanying paper  
81 also demonstrates that MICU subunits do not occlude the MCU pore. Rather, MICUs potentiate MCU  
82 activity as cytosolic  $[\text{Ca}^{2+}]$  is elevated (29).

83

## 84 **Results**

### 85 **Structure determination**

86 The human MCU supercomplex was expressed in HEK 293F cells containing BacMam viruses for  
87 each of the genes *mcu*, *mcub*, *micu1*, *micu2*, and *emre*. After extensive optimization of reactants, we  
88 obtained an abundant amount of high quality MES and MEMMS protein samples, pulled-down by the  
89 C-terminally Strep-tagged EMRE in purification buffer with or without (EGTA)  $\text{Ca}^{2+}$ , respectively.  
90 These samples (MES and MEMMS) were used to pool the grids for cryo-EM analyses (fig. S1, A and  
91 B, and Methods). Images were recorded with a combination of a Titan Krios Cryo-EM and a K2 direct  
92 electron detector in super-resolution mode (fig. S1, C and D). After extensive 2D and 3D classification  
93 of particles, a subset of particles was subjected to refinement, resulting in a 3D density map of MES  
94 at an overall resolution of 3.41 Å, and a density map of MEMMS at an overall resolution of 3.64 Å  
95 (Gold-standard FSC 0.143 criterion) (30, 31) (fig. S1, E and F, and fig. S2). Further subregion  
96 refinement with two different masks for the helical region and the N-terminal region of MES improved  
97 the resolution for these two regions to around 3.27 Å. Subregion refinement with masks for MICU1-  
98 MICU2, the helical region, and the N-terminal region of MEMMS further improved the resolution for  
99 these regions to 3.71, 3.30, and 3.39 Å, respectively (Gold-standard FSC 0.143 criterion) (30, 31) (fig.  
100 S2).

101 We subsequently obtained our high-resolution human MES and MEMMS structures based on a  
102 combination of structure docking and *de novo* modeling (32, 33). The well-resolved density maps  
103 allowed us to build structural models for almost all residues with their side chains (Fig. 1, A and B,  
104 and figs. S3 and S4). However, three sets of densities were not optimal for model building. The first  
105 is the density for the highly conserved C-terminal poly-D tail (EMRE<sup>101-107</sup>: EDDDDDD) of EMRE  
106 (18), the second is the conserved N-terminal poly-K (MICU1<sup>99-102</sup>: KKKK) of MICU1, and the third  
107 is the density for the conserved C-terminal helix (around 450-470) of MICU1 (fig. S5, A and B). The  
108 ambiguity of these densities might be owing to the double strep tag we added, and the flexibility of  
109 these regions.

110 Despite our inclusion of a total of 5 transgenes in HEK 293F cells, the final structure only contains  
111 two kinds of subunits (MCU and EMRE) when the purification buffer contains Ca<sup>2+</sup>, and four kinds  
112 of subunits (MCU, EMRE, MICU1, and MICU2) when the expression and purification procedure is  
113 deprived of Ca<sup>2+</sup> by adding EGTA. Within the MEMMS structure, we detected 2 Ca<sup>2+</sup> ions, 8  
114 cardiolipins (CDLs), and 16 phosphatidylcholines (PLXs). There were additional four Ca<sup>2+</sup> ions within  
115 the MES structure (Fig. 1, A and B, and fig. S3, E and F).

116

### 117 **Overall structure of human MEMMS**

118 Unlike previous fungal MCU homo-tetrameric structures (24-27), human MES forms a V-shaped  
119 structure comprising two hetero-octamers in C2 symmetry, in agreement with the human MES  
120 structure reported by Jiang's team (28) (fig. S4A). Interestingly, human MEMMS forms an O-shaped  
121 ring, with a pair of MICU1-MICU2 heterodimer appearing like a bridge across the MES at the  
122 intermembrane space (IMS) side (Fig. 1A, and fig. S4B). When MICU1-FLAG plasmid was  
123 transfected into MICU2 KO HEK 293T cells, MICU1-FLAG was still able to co-precipitate with MCU,  
124 indicating that MICU2 is not required for interactions between MICU1 and MCU, which is consistent  
125 with our structure (Fig. 1C).

126 Alignment of MES and MEMMS shows that the helical region of these two complexes can perfectly  
127 match each other (fig. S4, D and E). Thus, in the later paragraphs, we mainly describe the structural  
128 features of MEMMS. MEMMS has a molecular weight of about 480 kDa and an overall dimension of

129 210 Å x 190 Å (Fig. 1A). The overall structure adopts the shape similar to that of two “goldfish,” as  
130 if glued together at both their heads (MICU1/MICU2 dimer) and tails (NTD of MCU), with the two  
131 transmembrane domains (TMDs) of MCU forming an angle reminiscent of ATP synthase dimers,  
132 located at cristae ridges of the inner mitochondrial membrane (34-36) (Fig. 1A).

133 The MCU subunit comprises three structural domains: the TMD, the coiled-coil domain (CCD), and  
134 the NTD (Fig. 1B). The TMD of MCU is known to be responsible for Ca<sup>2+</sup> selectivity and conduction,  
135 and each MCU subunit contributes two transmembrane helices to the TMD: TM1 and TM2. Together,  
136 the four TM2s, which contain the highly conserved signature sequence (WDIMEP) (13, 14, 17), form  
137 the inner wall of the Ca<sup>2+</sup> channel, and the four TM1s form the exterior wall of the channel. On the  
138 IMS side, TM1 and TM2 are linked by a short loop, forming a hairpin structure (fig. S6A). TM1 and  
139 TM2 are not parallel; instead, an obvious gap is formed between the two helices on the matrix side,  
140 which is filled by one PLX and one CDL molecules (Fig. 1B and fig. S6A).

141 The CCD and NTD of MCU are located in the mitochondrial matrix. The CCD of each MCU subunit  
142 comprises three  $\alpha$ -helices: an exceptionally long and obviously bent helix (cc1), a lateral helix (cc2),  
143 and a short helix (cc3). Helix cc1 is extended from TM1, forming the coiled-coil structure in CCD  
144 with helix cc3. Helix cc2 links TM2 and cc3 (fig. S6A). The CCDs from human and fungi (24-27)  
145 both appear as “swollen bellies”. However, the human CCD is considerably larger than fungal ones.  
146 The NTDs of the four MCU subunits align in a configuration resembling that of bent “goldfish tails”.  
147 The NTD is connected to the cc1 via the linking helix  $\alpha$ 1, and the four  $\alpha$ 1 helices of each MCU subunits  
148 stably interact with each other, forming a four-helix bundle that stabilizes the MCU tetramers (fig.  
149 S6B).

150

### 151 **EMRE encages MCU and directly interacts with MICU1**

152 EMRE is a small protein, containing only 107 residues after translation, and its 47 N-terminal residues  
153 are cut off after its transport into mitochondria (18). EMRE has been known to be required for  
154 mitochondrial Ca<sup>2+</sup> uptake in human cells (18, 37). Within the membrane, four EMREs, four CDLs,  
155 four horizontal PLXs, and four vertical PLXs form a cage. They bundle up the four MCU subunits,

156 thereby stabilizing and likely supporting a functional conformation of the Ca<sup>2+</sup> channel (Fig. 2, A and  
157 B).

158 In our structure, the N-terminal (residues 48-65) and C-terminal (residues 97-107) residues of EMRE  
159 appear as loops, while its middle residues (residues 66-96) adopt the configuration of a single  $\alpha$ -helix.  
160 This middle EMRE  $\alpha$ -helix locates within the membrane and is tilted by 37° relative to the membrane  
161 plane normal, such that each EMRE subunit interacts with two neighboring MCU subunits (Fig. 2, B  
162 and C). The N-terminal loop of EMRE protrudes into the particularly large chamber of CCD, forming  
163 rich hydrogen bonds with cc2 and cc3, and even with a CDL molecule (Fig. 2C).

164 The negatively charged C-terminal loops of EMRE protrude into the IMS and are responsible for direct  
165 interaction with MICU1. The structure shows no direct interaction between MICU1 and MCU. The  
166 positively charged N-terminal poly-K (residues 99-102) region of MICU1 and the negatively charged  
167 C-terminal tail (residues 93-107) of EMRE are in close proximity to each other, as shown by clear  
168 interactions between MICU1 Gly<sup>105</sup>, Phe<sup>106</sup> and EMRE Glu<sup>93</sup>, Glu<sup>101</sup> (Fig. 2D), consistent with  
169 previous functional study which has detected interactions between these two oppositely charged tails  
170 (38). To confirm the linking role of MICU1 poly-K region, we deleted these amino acids and  
171 subsequently found that MICU1- $\Delta$ K cannot co-precipitate with MCU (Fig. 2E). In addition, we found  
172 Ser<sup>339</sup>, Lys<sup>340</sup>, Lys<sup>341</sup> sequence in MICU1 C-lobe that can also interact with the negatively charged tail  
173 of another adjacent EMRE (Fig. 2D). So, we introduced a triple mutation (S339E, K340E, K341E) in  
174 MICU1 and found that the triple mutant also has reduced interaction with MCU. Finally, we truncated  
175 the negatively charged tail (residues 93-107) of EMRE, and the Ca<sup>2+</sup> uptake rate of MCU complex in  
176 high [Ca<sup>2+</sup>] condition was reduced about twofold (Fig. 2E). These results indicate that the N-terminal  
177 domain and Ser<sup>339</sup>, Lys<sup>340</sup>, Lys<sup>341</sup> sequence of MICU1 are important for its recruitment onto  
178 MCU/EMRE complex, most probably through interactions with the negatively charged C-terminal tail  
179 of EMRE. Furthermore, the interaction between the MCU/EMRE pore and the MICU1/MICU2 dimer  
180 appears to have a positive effect on the Ca<sup>2+</sup>-transport activity.

181

182 **MICU1 and MICU2 do not occlude the MCU pore**

183 MEMMS are linked at the IMS side via MICU1 and MICU2, and at the matrix side via MCU NTDs  
184 (Fig. 1A). Each MICU1 and MICU2 subunit contains four EF-hands, of which two are capable of  
185 binding  $\text{Ca}^{2+}$  ions (39). However, in our structure, no  $\text{Ca}^{2+}$  is bound to MICU1 or MICU2 subunits,  
186 which can be attributed to the deprivation of  $\text{Ca}^{2+}$  by EGTA during expression and purification (Fig.  
187 3A). Alignment of MICU1 and MICU2 shows that they have very similar core structures (N-lobe and  
188 C-lobe), but their N-terminal domains and C-terminal helices are different (Fig. 3A). The N-terminal  
189 domain and Ser<sup>339</sup>, Lys<sup>340</sup>, Lys<sup>341</sup> sequence of MICU1 can interact with EMRE as discussed above.  
190 MICU1 and MICU2 form a hetero-dimer in a previously reported ‘face-to-face’ pattern, while the two  
191 MICU2 subunits interact in a ‘back-to-back’ pattern (40). Consequently, the N and C lobes of MICU1  
192 and MICU2 subunits are arranged in an alternative pattern to link two MCU channels (Fig. 3, B and  
193 C).

194 Previous models suggested that MICU1/2 dimer occludes the MCU pore (22, 23, 39, 40) at low  
195 cytosolic [ $\text{Ca}^{2+}$ ], which is obviously not the case as shown by the MEMMS structure (obtained in the  
196 presence of EGTA). The accompanying manuscript also reports that MICU subunits do not occlude  
197 the MCU channel in low cytosolic [ $\text{Ca}^{2+}$ ], using direct patch-clamp analysis of MCU currents (29).

198 In addition to the EMRE/MICU1 interactions, the C-terminal helices of both MICU1 and MICU2 also  
199 contribute to MICU localization onto the inner membrane (fig. S7). In the MEMMS structure, although  
200 it's difficult to analyze the detailed interactions between these two helices due to the vague local density,  
201 one can still appreciate that the two helices are parallel to each other at the surface of inner  
202 mitochondrial membrane (Fig. 2D and fig. S3G). The C-terminal helices of MICU2 have hydrophobic  
203 residues partially buried in the inner membrane, while the positively charged residues point parallel to  
204 the membrane, interacting with the negatively charged phosphates of the membrane (fig. S7). This is  
205 in agreement with the previous reports that MICU1 and MICU2 directly interact with the lipid  
206 membrane (12, 41, 42). Previous reports also show that the C-terminal helix is important for the  
207 interaction of MICU1 with MES (43, 44). Accordingly, deletion of MICU1 C-terminal helix  
208 significantly weakened the binding of MICU1 to MCU, and even lowered  $\text{Ca}^{2+}$  uptake activity (43,  
209 44). Although the density map of this area is not clear enough for deciphering detailed interactions, we  
210 find that MICU1 C-terminal helix is in close vicinity of the EMRE helix (Fig. 2D). In a previous study,



211 Co-IP assay showed that MICU2  $\Delta C$  could not interact with MICU1 or MCU (39). These findings are  
212 consistent with the MEMMS structure, in which the C-terminal helices act as an anchor to maintain  
213 MICU1 and MICU2 near to each other at the surface of inner mitochondrial membrane.

214 In the MES structure solved under high  $[Ca^{2+}]$ , no electron density can be associated with MICU1 or  
215 MICU2. We consider that the loss of MICUs is an artifact of the purification procedure. Since the  
216 membrane was solubilized in detergent, the C-terminal helix could lose its attachment with the  
217 membrane. In addition, when EF hands are occupied by  $Ca^{2+}$ , conformational change of MICUs likely  
218 makes them more vulnerable to dissociation, leading to loss of MICU1 and MICU2 in the MES  
219 structure.  $Ca^{2+}$  uptake in high  $[Ca^{2+}]$  condition was impaired in MICU1 $\Delta C$  cells (44), which also  
220 suggests MICU1 is very likely attached to MCU in high  $[Ca^{2+}]$ . In fact, in a previous report, interaction  
221 between MCU and MICU1 in high  $[Ca^{2+}]$  was detected through co-IP (44).

222 In the matrix, the four NTDs align in a bent “fish-tail” configuration (fig. S8A). Note that this fish-tail  
223 alignment is in agreement with the previously reported MCU NTD crystal structure from human (45,  
224 46), cryo-EM structure of the zebrafish MCU (25), and the recently published MES structure from  
225 human (28), but is quite distinct from the MCU structures from fungi (24-27) (fig. S8B). At the  
226 interface between the two fish-tails in MEMMS, three NTD pairs are tightly connected, while one set  
227 of NTDs are spared, which is the same case in MES (fig. S8C). Interestingly, the interaction patterns  
228 are not identical for all three pairs, and the only polar interaction that occurs commonly for all three  
229 pairs is between Asp<sup>123</sup> and Arg<sup>93</sup>. We mutated Asp<sup>123</sup> to Arg, or Arg<sup>93</sup> to Asp, respectively, and found  
230 that both mutations have negligible influence on the  $Ca^{2+}$  uptake rate (fig. S8D). Thus, the other  
231 interactions between the three NTD pairs could still hold the two MCU channels together *in vivo* after  
232 these mutations.

233

### 234 **Phospholipids and the matrix gate**

235 In both MES and MEMMS structures, one CDL and one horizontal PLX molecules inserts into the  
236 gap between TM1 and TM2 of each MCU subunit, and another vertical PLX molecule stands alongside  
237 each TM2. Notably, most of the lipid chains of the CDL and vertical PLX in our structure are parallel  
238 to the helices of TMD, while the lipid chains of the horizontal PLX are positioned horizontally in the

239 membrane (Fig. 4A and fig. S6A). In a previous fungal structure (24), a horizontal PLX molecule was  
240 also found in the wall of the MCU channel. However, when we compare these two structures, the  
241 position of these two PLX molecules does not match.

242 In addition to interacting with TM1, TM2, and cc2 of one MCU subunit, each CDL molecule also  
243 interacts tightly with the neighboring EMRE. Specifically, a highly conserved residue of MCU cc2,  
244 Arg<sup>297</sup>, can form stable hydrogen bonds with both the phosphate group of CDL and the main chain  
245 oxygen of Val<sup>61</sup> in EMRE (Fig. 4A), indicating Arg<sup>297</sup> could be a critical residue for MCU regulation.  
246 This interaction (MCU- Arg<sup>297</sup> to EMRE-Val<sup>61</sup>) is also observed in a previous human MES structure  
247 (28), however, interacting phospholipids were not detected. In the same report, authors truncated the  
248 N-terminal loop of EMRE, residue by residue until Lys<sup>59</sup>, and found that the Ca<sup>2+</sup> uptake activity of  
249 MCU decreased gradually. Further truncation resulted in no EMRE expression, so the interaction  
250 between Arg<sup>297</sup> and Val<sup>61</sup> was not tested (28). To supplement, we mutated Arg<sup>297</sup> to Asp, and strikingly  
251 this mutation completely abolished the Ca<sup>2+</sup> uptake via MCU (Fig. 4B). Similarly, P60A mutation in  
252 EMRE, just next to the MCU-Arg<sup>297</sup>, can also totally abolish MCU activity (47), adding importance  
253 to correct interactions between cc2 and EMRE.

254 It has been proposed that cc2 and cc3 form a luminal gate near the matrix side of MCU that is  
255 maintained in an open conformation via its interaction with EMRE (28, 48). The previous human MES  
256 structure and our MES and MEMMS structures all detected stable hydrogen bonds between EMRE N-  
257 terminal loop and MCU cc2-cc3 (Fig. 4A), however, we also found several phospholipids filling the  
258 gaps between helices from MCU and EMRE. These phospholipids could stabilize the gaps and provide  
259 elasticity to this region, enabling the gate to be opened by EMRE (Fig. 4C). The MCU-R297D  
260 mutation might dissociate the bound CDL and disrupt the attachment of EMRE on cc2. This would  
261 leave cc2 free to roll aside and possibly push the negatively charged Glu<sup>288</sup> and Glu<sup>293</sup> residues of  
262 MCU inward, thus making the channel non-conducting. We observed multiple hydrophobic  
263 interactions between cc3 and cc1, which might help to achieve a correct position of the gate-forming  
264 cc2 (Fig. 4A and fig. S6A). The amino acid residues participating in these hydrophobic interactions  
265 are highly conserved and were shown to be indispensable for MCU activity (48). Besides, the

266 negatively charged polar head of the horizontal PLX is also very likely involved in forming the gate,  
267 because their conformation is quite stable and they protrude deeply into the channel (Fig. 4C).

268

### 269 **The MCU pore and its regulation by MICU1/2**

270 We detected three  $\text{Ca}^{2+}$  ions in each pore of the MES structure (using buffers containing  $\text{Ca}^{2+}$ ), and  
271 only a single  $\text{Ca}^{2+}$  ion in each pore in the MEMMS structure (using buffers deprived of  $\text{Ca}^{2+}$  by 0.1 mM  
272 EGTA) (fig. S3, E and F). These  $\text{Ca}^{2+}$  ions are surrounded by the WDXXEP signature sequence  
273 (WDIMEP in human) adjacent to IMS, which was proposed to serve as a selectivity filter and discussed  
274 in detail previously (24-28). Four Asp<sup>261</sup> residues form the first  $\text{Ca}^{2+}$  binding site, four Glu<sup>264</sup> residues  
275 form the second, while four Tyr<sup>268</sup> residues surround the third  $\text{Ca}^{2+}$  in MES (fig. S9, A and B). In the  
276 MEMMS structure, a single  $\text{Ca}^{2+}$  ion was detected at the high-affinity Glu<sup>264</sup> site, the narrowest site in  
277 the pore (fig. S9C). The Glu<sup>264</sup> site is likely the same site in the MCU pore that was previously reported  
278 to bind cytosolic  $\text{Ca}^{2+}$  with  $K_d \leq 2$  nM (6), and thus it should always be occupied by  $\text{Ca}^{2+}$  under  
279 physiological conditions. The lowest cytosolic [ $\text{Ca}^{2+}$ ] at which  $\text{Ca}^{2+}$  permeation through the MCU pore  
280 can occur is ~100 nM (22, 49, 50). At this concentration,  $\text{Ca}^{2+}$  should start binding to the Asp<sup>261</sup> site,  
281 which reduces affinity for  $\text{Ca}^{2+}$  binding at Glu<sup>264</sup> and makes permeation possible. Our MEMMS  
282 structure does not have  $\text{Ca}^{2+}$  at the Asp<sup>261</sup> site, and [ $\text{Ca}^{2+}$ ] in which MEMMS structure was determined  
283 was below 100 nM. This is expected, as the sample was washed multiple times with buffers containing  
284 0.1 mM EGTA (see Methods). The estimated  $K_d$  for  $\text{Ca}^{2+}$  binding of MICU1/2 dimer is ~600 nM (51),  
285 therefore it is also expected that the EF hands of MICU subunits in our MEMMS structure are  $\text{Ca}^{2+}$ -  
286 free.

287 In MEMMS, MICU1/2 drag the two MCU tetramers closer to each other as compared to MES (fig.  
288 S4E). However, the pores of the MES and MEMMS structures are similar at both the selectivity filter  
289 and the putative matrix gate and show no possible obstructions for  $\text{Ca}^{2+}$  permeation (Fig. 5, A to C).  
290 This indicates that the binding of MICU1/2, does not occlude or obstruct the MCU pore. This  
291 conclusion is in a striking contrast to the currently accepted model of MICU1/MICU2 dimer (22, 23,  
292 39, 40). However, our observations are consistent with the accompanying manuscript, in which authors

293 also found that in low  $[Ca^{2+}]$  conditions, the MCU pore is open and conducts similar currents in both  
294 the MICU1-deficient MCU complex (MES) and wide type MCU complex (MEMMS) (29).  
295 With the four EF-hands of MICU1/2 dimers, MICU1/2 can sense the local cytosolic  $[Ca^{2+}]$  in the  
296 vicinity of the MCU pore and undergo conformational change upon  $Ca^{2+}$  binding. The accompanying  
297 manuscript by Garg et al., demonstrates that  $Ca^{2+}$  binding to MICU1/2 potentiates  $Ca^{2+}$  permeation  
298 through the MCU pore by increasing the probability of its open state. Our MEMMS structure and the  
299 previously proposed MCU gating mechanism (28) could explain this functional behavior of the MCU  
300 complex. Specifically, we hypothesize that after  $Ca^{2+}$  binding to their EF-hands, a conformational  
301 change in MICU1/2 dimers exerts a force upon EMRE and the elastic MCU matrix gate, thus  
302 increasing its probability of open state.

303

## 304 **Discussion**

305 In conclusion, here we report the first structure of intact MCU supercomplex as a 20-subunit O-shaped  
306 dimer of hetero-decamers, with auxiliary MICU1 and MICU2 subunits attached. We discovered that a  
307 pair of MICU1-MICU2 hetero-dimers link the two MCU channels, which is obviously different from  
308 previous models that assume MICU1/2 oligomers to ride across the MCU pore and occlude it in low  
309 cytosolic  $[Ca^{2+}]$ . We found that MICU1 does not directly contact MCU, but can attach onto the MCU  
310 complex through interaction with EMRE, indicating that a critical function of EMRE is to couple the  
311  $Ca^{2+}$ -sensing MICUs with the MCU channel. We propose that upon  $Ca^{2+}$  binding to their EF hands,  
312 MICU1/2 exert a pulling force upon EMRE to stabilize the open state of the MCU matrix gate. These  
313 results are in agreement with the accompanying paper showing that  $Ca^{2+}$ -free MICUs have no effect  
314 on ion permeation via MCU, and MICUs potentiate MCU function as cytosolic  $Ca^{2+}$  binds to their EF  
315 hands (29).

316 As shown in the MEMMS structure, two MICU1 and two MICU2 subunits form a straight line between  
317 the two MCU channels. EMRE could function like a lever, with its C-terminal loop interacting with  
318 MICU1, its central helix anchored to TM1 of MCU as the pivot, and its N-terminal loop supporting  
319 MCU CCD. The interaction between MCU Arg<sup>297</sup> and EMRE Val<sup>61</sup> is the force bearing point of cc2  
320 (R297D mutation makes the MCU channel nonfunctional). In addition, we detected rich phospholipids

321 around the MCU matrix gate (formed by the loop between TM2 and cc2), which could provide  
322 elasticity to this region. After Ca<sup>2+</sup> binding, conformational change of MICU1/2 could exert a pull on  
323 the EMRE N-terminal, and cause the enlargement (or stabilization of the open state) of the MCU  
324 matrix gate (Fig. 5E).

325 We compared our MES structure with previous fungal MCU structures to find that human MES has a  
326 swollen CCD enlarged by EMRE (fig. S10). This curvature is very likely facilitated by Pro<sup>216</sup> of cc1,  
327 which is conserved in mammals but absent in fungi (fig. S10E). The cc2s in reported fungal MCU  
328 structures are not well resolved, indicating that their position is flexible possibly due to lack of EMRE.  
329 The curvature of cc1 and the tight cc1-cc3 interaction could probably elevate the position of cc2 and  
330 close the gate if no EMRE is bound. Consequently, we propose that because fungal MCU does not  
331 have an elevated cc2, it does not require EMRE to maintain an open position. In contrast, EMRE is  
332 indispensable for human MCU because its cc2 is supported by EMRE N-terminal loop.

333

334

335

336 **References and notes**

- 337 1. M. Gemba, E. Nakatani, M. Teramoto, S. Nakano, Effect of cisplatin on calcium uptake by rat kidney cortical  
338 mitochondria. *Toxicol Lett* **38**, 291-297 (1987).
- 339 2. F. R. Mraz, Calcium and strontium uptake by rat liver and kidney mitochondria. *Proc Soc Exp Biol Med*  
340 **111**, 429-431 (1962).
- 341 3. H. F. Deluca, G. W. Engstrom, Calcium uptake by rat kidney mitochondria. *Proc Natl Acad Sci U S A* **47**,  
342 1744-1750 (1961).
- 343 4. T. E. Gunter, D. R. Pfeiffer, Mechanisms by Which Mitochondria Transport Calcium. *Am J Physiol* **258**,  
344 C755-C786 (1990).
- 345 5. F. D. Vasington, J. V. Murphy, Ca<sup>++</sup> Uptake by Rat Kidney Mitochondria and Its Dependence on Respiration  
346 and Phosphorylation. *J Biol Chem* **237**, 2670-& (1962).
- 347 6. Y. Kirichok, G. Krapivinsky, D. E. Clapham, The mitochondrial calcium uniporter is a highly selective ion  
348 channel. *Nature* **427**, 360-364 (2004).
- 349 7. D. W. Jiang, L. L. Zhao, D. E. Clapham, Genome-Wide RNAi Screen Identifies Letm1 as a Mitochondrial  
350 Ca<sup>2+</sup>/H<sup>+</sup> Antiporter. *Science* **326**, 144-147 (2009).
- 351 8. R. Palty *et al.*, NCLX is an essential component of mitochondrial Na<sup>+</sup>/Ca<sup>2+</sup> exchange. *P Natl Acad Sci USA*  
352 **107**, 436-441 (2010).
- 353 9. K. J. Kamer, V. K. Mootha, The molecular era of the mitochondrial calcium uniporter. *Nat Rev Mol Cell Biol*  
354 **16**, 545-553 (2015).
- 355 10. D. De Stefani, R. Rizzuto, T. Pozzan, Enjoy the Trip: Calcium in Mitochondria Back and Forth. *Annu Rev*  
356 *Biochem* **85**, 161-192 (2016).
- 357 11. M. Patron *et al.*, The mitochondrial calcium uniporter (MCU): molecular identity and physiological roles. *J*  
358 *Biol Chem* **288**, 10750-10758 (2013).
- 359 12. F. Perocchi *et al.*, MICU1 encodes a mitochondrial EF hand protein required for Ca<sup>2+</sup> uptake. *Nature* **467**,  
360 291-U267 (2010).
- 361 13. J. M. Baughman *et al.*, Integrative genomics identifies MCU as an essential component of the mitochondrial  
362 calcium uniporter. *Nature* **476**, 341-U111 (2011).
- 363 14. D. De Stefani, A. Raffaello, E. Teardo, I. Szabo, R. Rizzuto, A forty-kilodalton protein of the inner membrane  
364 is the mitochondrial calcium uniporter. *Nature* **476**, 336-U104 (2011).
- 365 15. D. Chaudhuri, Y. Sancak, V. K. Mootha, D. E. Clapham, MCU encodes the pore conducting mitochondrial  
366 calcium currents. *Elife* **2**, e00704 (2013).
- 367 16. M. Plovanich *et al.*, MICU2, a Paralog of MICU1, Resides within the Mitochondrial Uniporter Complex to  
368 Regulate Calcium Handling. *Plos One* **8**, (2013).
- 369 17. A. Raffaello *et al.*, The mitochondrial calcium uniporter is a multimer that can include a dominant-  
370 negative pore-forming subunit. *EMBO J* **32**, 2362-2376 (2013).
- 371 18. Y. Sancak *et al.*, EMRE Is an Essential Component of the Mitochondrial Calcium Uniporter Complex.  
372 *Science* **342**, 1379-1382 (2013).
- 373 19. N. Demareux, M. Rosselin, Redox Control of Mitochondrial Calcium Uptake. *Mol Cell* **65**, 961-962 (2017).

- 374 20. M. Ahuja, S. Muallem, The gatekeepers of mitochondrial calcium influx: MICU1 and MICU2. *Embo Rep* **15**,  
375 205-206 (2014).
- 376 21. A. G. Bick *et al.*, Cardiovascular homeostasis dependence on MICU2, a regulatory subunit of the  
377 mitochondrial calcium uniporter. *Proc Natl Acad Sci U S A* **114**, E9096-E9104 (2017).
- 378 22. M. Paillard *et al.*, MICU1 Interacts with the D-Ring of the MCU Pore to Control Its Ca(2+) Flux and  
379 Sensitivity to Ru360. *Mol Cell* **72**, 778-785 e773 (2018).
- 380 23. C. B. Phillips, C. W. Tsai, M. F. Tsai, The conserved aspartate ring of MCU mediates MICU1 binding and  
381 regulation in the mitochondrial calcium uniporter complex. *Elife* **8**, (2019).
- 382 24. R. Baradaran, C. Wang, A. F. Siliciano, S. B. Long, Cryo-EM structures of fungal and metazoan  
383 mitochondrial calcium uniporters. *Nature* **559**, 580-584 (2018).
- 384 25. C. Fan *et al.*, X-ray and cryo-EM structures of the mitochondrial calcium uniporter. *Nature* **559**, 575-579  
385 (2018).
- 386 26. N. X. Nguyen *et al.*, Cryo-EM structure of a fungal mitochondrial calcium uniporter. *Nature* **559**, 570-574  
387 (2018).
- 388 27. J. Yoo *et al.*, Cryo-EM structure of a mitochondrial calcium uniporter. *Science* **361**, 506-+ (2018).
- 389 28. Y. Wang *et al.*, Structural Mechanism of EMRE-Dependent Gating of the Human Mitochondrial Calcium  
390 Uniporter. *Cell* **177**, 1252-1261 e1213 (2019).
- 391 29. V. Garg *et al.*, The Mechanism of MICU-Dependent Gating of the Mitochondrial Ca<sup>2+</sup> Uniporter. *bioRxiv*,  
392 2020.2004.2004.025833 (2020).
- 393 30. W. Du *et al.*, Kinesin 1 Drives Autolysosome Tubulation. *Dev Cell* **37**, 326-336 (2016).
- 394 31. J. Zivanov *et al.*, New tools for automated high-resolution cryo-EM structure determination in RELION-3.  
395 *Elife* **7**, (2018).
- 396 32. P. Emsley, B. Lohkamp, W. G. Scott, K. Cowtan, Features and development of Coot. *Acta Crystallogr D Biol*  
397 *Crystallogr* **66**, 486-501 (2010).
- 398 33. P. D. Adams *et al.*, PHENIX: a comprehensive Python-based system for macromolecular structure solution.  
399 *Acta Crystallogr D Biol Crystallogr* **66**, 213-221 (2010).
- 400 34. S. Cogliati, J. A. Enriquez, L. Scorrano, Mitochondrial Cristae: Where Beauty Meets Functionality. *Trends*  
401 *Biochem Sci* **41**, 261-273 (2016).
- 402 35. J. Habersetzer *et al.*, ATP synthase oligomerization: from the enzyme models to the mitochondrial  
403 morphology. *Int J Biochem Cell Biol* **45**, 99-105 (2013).
- 404 36. R. Guo, S. Zong, M. Wu, J. Gu, M. Yang, Architecture of Human Mitochondrial Respiratory Megacomplex  
405 I2III2IV2. *Cell* **170**, 1247-1257 e1212 (2017).
- 406 37. E. Kovacs-Bogdan *et al.*, Reconstitution of the mitochondrial calcium uniporter in yeast. *Proc Natl Acad Sci*  
407 *U S A* **111**, 8985-8990 (2014).
- 408 38. M. F. Tsai *et al.*, Dual functions of a small regulatory subunit in the mitochondrial calcium uniporter  
409 complex. *Elife* **5**, (2016).
- 410 39. K. J. Kamer, W. Jiang, V. K. Kaushik, V. K. Mootha, Z. Grabarek, Crystal structure of MICU2 and comparison  
411 with MICU1 reveal insights into the uniporter gating mechanism. *Proc Natl Acad Sci U S A* **116**, 3546-3555  
412 (2019).
- 413 40. Y. Xing *et al.*, Dimerization of MICU Proteins Controls Ca(2+) Influx through the Mitochondrial Ca(2+)  
414 Uniporter. *Cell Rep* **26**, 1203-1212 e1204 (2019).

- 415 41. K. J. Kamer, Z. Grabarek, V. K. Mootha, High-affinity cooperative Ca<sup>2+</sup> binding by MICU1-MICU2 serves  
416 as an on-off switch for the uniporter. *Embo Rep* **18**, 1397-1411 (2017).
- 417 42. G. Csordas *et al.*, MICU1 Controls Both the Threshold and Cooperative Activation of the Mitochondrial  
418 Ca<sup>2+</sup> Uniporter. *Cell Metab* **17**, 976-987 (2013).
- 419 43. K. J. Kamer, V. K. Mootha, MICU1 and MICU2 play nonredundant roles in the regulation of the  
420 mitochondrial calcium uniporter. *EMBO Rep* **15**, 299-307 (2014).
- 421 44. L. Wang *et al.*, Structural and mechanistic insights into MICU1 regulation of mitochondrial calcium uptake.  
422 *EMBO J* **33**, 594-604 (2014).
- 423 45. Y. Lee *et al.*, Structure and function of the N-terminal domain of the human mitochondrial calcium  
424 uniporter. *Embo Rep* **16**, 1318-1333 (2015).
- 425 46. S. K. Lee *et al.*, Structural Insights into Mitochondrial Calcium Uniporter Regulation by Divalent Cations.  
426 *Cell Chem Biol* **23**, 1157-1169 (2016).
- 427 47. T. Yamamoto *et al.*, Analysis of the structure and function of EMRE in a yeast expression system. *Biochim*  
428 *Biophys Acta* **1857**, 831-839 (2016).
- 429 48. T. Yamamoto *et al.*, Functional analysis of coiled-coil domains of MCU in mitochondrial calcium uptake.  
430 *Biochim Biophys Acta Bioenerg*, 148061 (2019).
- 431 49. G. Bhosale *et al.*, Pathological consequences of MICU1 mutations on mitochondrial calcium signalling and  
432 bioenergetics. *Biochim Biophys Acta Mol Cell Res* **1864**, 1009-1017 (2017).
- 433 50. K. Mallilankaraman *et al.*, MICU1 Is an Essential Gatekeeper for MCU-Mediated Mitochondrial Ca<sup>2+</sup>  
434 Uptake that Regulates Cell Survival. *Cell* **151**, 630-644 (2012).
- 435 51. K. J. Kamer, Z. Grabarek, V. K. Mootha, High-affinity cooperative Ca<sup>2+</sup> binding by MICU1-MICU2 serves as  
436 an on-off switch for the uniporter. *Embo Rep* **18**, 1397-1411 (2017).
- 437 52. A. Goehring *et al.*, Screening and large-scale expression of membrane proteins in mammalian cells for  
438 structural studies. *Nat Protoc* **9**, 2574-2585 (2014).
- 439 53. S. Q. Zheng *et al.*, MotionCor2: anisotropic correction of beam-induced motion for improved cryo-electron  
440 microscopy. *Nat Methods* **14**, 331-332 (2017).
- 441 54. J. A. Mindell, N. Grigorieff, Accurate determination of local defocus and specimen tilt in electron  
442 microscopy. *J Struct Biol* **142**, 334-347 (2003).
- 443 55. K. Zhang, Gctf: Real-time CTF determination and correction. *J Struct Biol* **193**, 1-12 (2016).
- 444 56. E. F. Pettersen *et al.*, UCSF Chimera--a visualization system for exploratory research and analysis. *J*  
445 *Comput Chem* **25**, 1605-1612 (2004).
- 446 57. S. H. Scheres, S. Chen, Prevention of overfitting in cryo-EM structure determination. *Nat Methods* **9**, 853-  
447 854 (2012).
- 448 58. P. B. Rosenthal, R. Henderson, Optimal determination of particle orientation, absolute hand, and contrast  
449 loss in single-particle electron cryomicroscopy. *J Mol Biol* **333**, 721-745 (2003).
- 450 59. A. Kucukelbir, F. J. Sigworth, H. D. Tagare, Quantifying the local resolution of cryo-EM density maps. *Nat*  
451 *Methods* **11**, 63-65 (2014).
- 452 60. I. W. Davis *et al.*, MolProbity: all-atom contacts and structure validation for proteins and nucleic acids.  
453 *Nucleic Acids Res* **35**, W375-383 (2007).
- 454 61. O. S. Smart, J. G. Neduvilil, X. Wang, B. A. Wallace, M. S. Sansom, HOLE: a program for the analysis of the  
455 pore dimensions of ion channel structural models. *J Mol Graph* **14**, 354-360, 376 (1996).



- 456 62. N. Alexander, N. Woetzel, J. Meiler, bcl::Cluster : A method for clustering biological molecules coupled with  
457 visualization in the Pymol Molecular Graphics System. *IEEE Int Conf Comput Adv Bio Med Sci* **2011**, 13-18  
458 (2011).  
459 63. F. A. Ran *et al.*, Genome engineering using the CRISPR-Cas9 system. *Nat Protoc* **8**, 2281-2308 (2013).  
460

## 461 **Acknowledgements**

462 We thank the Cryo-EM Facility Center of Southern University of Science & Technology (Shenzhen)  
463 and the Tsinghua University Branch of China National Center for Protein Sciences (Beijing) for  
464 providing facility support. We would like to thank Qingxi Ma for helpful editing of the manuscript.  
465 Computation was completed on the Yang lab GPU workstation. **Funding:** This work was supported  
466 by funds from the National Key R&D Program of China (2017YFA0504601 and 2016YFA0501100).  
467 The National Science Fund for Distinguished Young Scholars (31625008) and the National Natural  
468 Science Foundation of China (21532004 and 31900857), and the China Postdoctoral Science  
469 Foundation (2018M631449). **Author contributions:** M.Y. conceived, designed, and supervised the  
470 project, built the model, analyzed the data and wrote the manuscript. W.Z., R.G., and L.Y. did the  
471 protein expression, purification, and detergent screening. H.Z., L.Z., and P.W. performed EM sample  
472 preparation, data collection and structural determination. W.Z., J.Y., Y.S. and W.Z. constructed the  
473 knockout cell lines, did the calcium uptake and Co-IP assays. All authors discussed the data of the  
474 manuscript. **Competing interests:** The authors declare no competing financial interests. **Data and**  
475 **materials availability:** The atomic coordinates of the MES and MEMMS have been deposited in the  
476 Worldwide Protein Data Bank with the accession codes 6K7X and 6K7Y, respectively. The  
477 corresponding maps have been deposited in the Electron Microscopy Data Bank with the accession  
478 codes EMD-9944 and EMD-9945, respectively.

479

480

## 481 **Supplementary Materials**

482 Materials and Methods

483 Figures S1-S10

484 Tables S1

485 References (51-62)

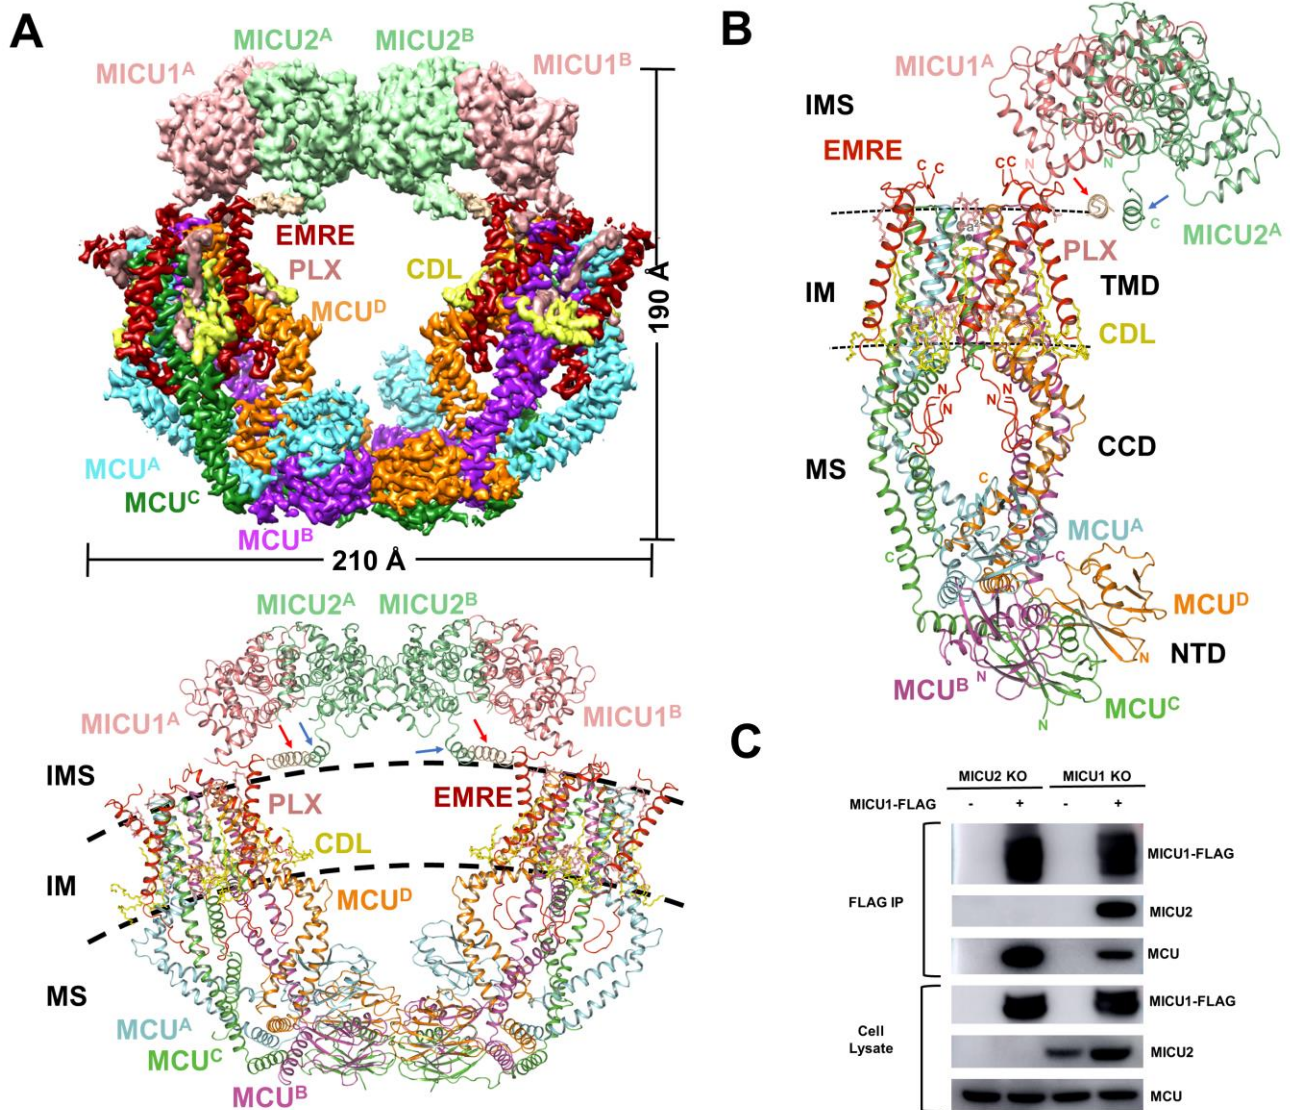

486

487 **Fig. 1. Overall structure of the MCU-EMRE-MICU1-MICU2 supercomplex.**

488 (A) Density map and structural model of MEMMS. PLXs, phosphatidylcholines, are shown in salmon;

489 CDLs, cardiolipins, are shown in yellow; subunits of MEMMS are differently colored. IMS,

490 intermembrane space; IM, inner membrane; MS, matrix. (B) Hetero-decamer of MEMMS. N and C

491 termini of each subunit are labeled. The colors are the same as in A. The position of NTD, CCD and

492 TMD of MCU are indicated. (C) FLAG co-immunoprecipitation of MICU1-FLAG expressed in

493 MICU1 KO, MICU2 KO HEK 293T cells with transient expression of MICU1-FLAG. Lysates and

494 elutes were immunoblotted with anti-FLAG, MCU or MICU2.

495

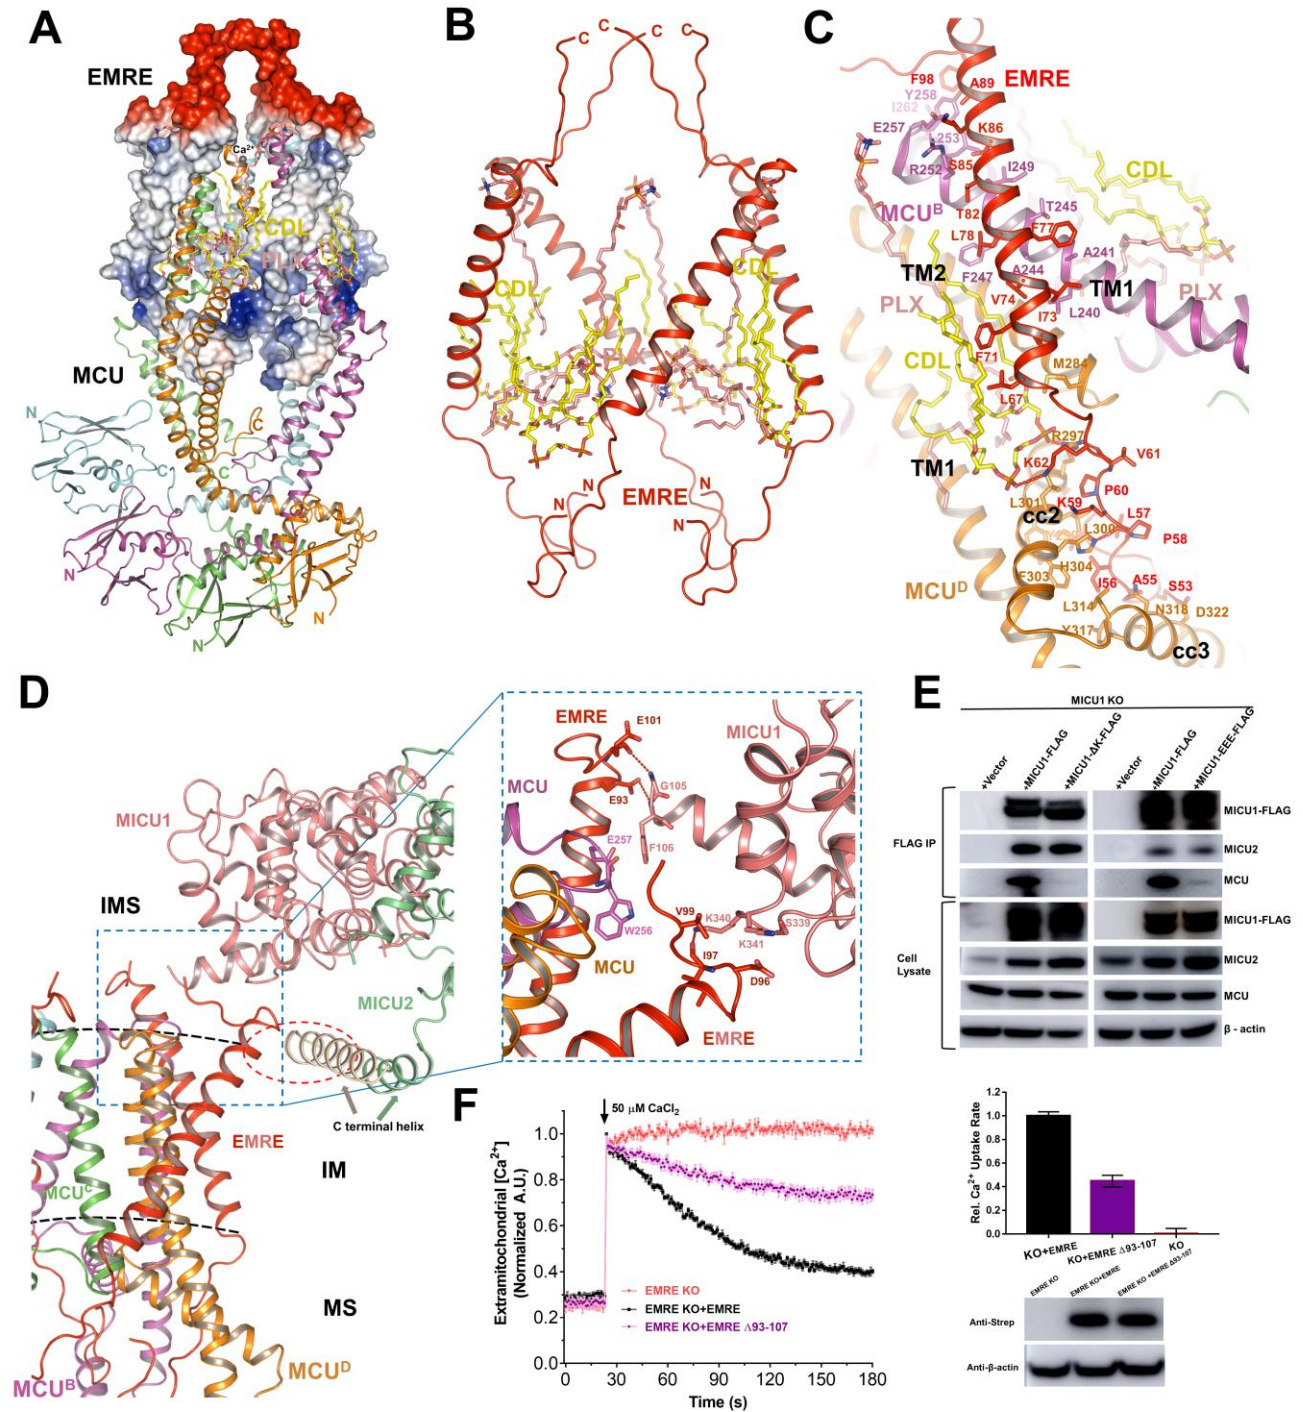

**Fig. 2. Interactions and functional roles of EMRE.**

(A) Four EMRE subunits form a cage surrounding the TMD of MCU. EMRE subunits are shown in an electrostatic surface model. The N-terminus of EMRE is positively charged, while the C-terminus is negatively charged. MCU subunits are shown in a cartoon model. Viewed from the membrane plane.

(B) EMRE subunits and phospholipids form a cage that bundles up the central MCU tetramer. Four EMRE subunits are distinguished by red and all N and C-terminals are noted. PLXs are colored salmon.

503 CDLs are colored yellow. **(C)** Detailed interaction between an EMRE (colored red) subunit and two  
504 MCU subunits (colored magenta and orange, respectively). Each EMRE interacts with two MCU.  
505 Transmembrane helix of EMRE interacts with TM1 of one MCU subunit, the N-terminal domain of  
506 EMRE interacts with the neighboring MCU cc2 and cc3. Residues responsible for interactions are  
507 labeled and shown as sticks. Hydrogen bonds are shown as red dashed lines. **(D)** Interactions between  
508 EMREs and one MICU1. The blue dashed box indicates the interactions between the tails of two  
509 EMRE and the one MICU1, the right enlarged dashed box shows the detail. Residues responsible for  
510 interactions are shown as sticks. Hydrogen bonds are shown as red dashed lines. The red dashed circle  
511 indicates interactions between MICU1 C-terminal helix and EMRE. **(E)** FLAG co-  
512 immunoprecipitation of MICU1-FLAG and related mutant constructs expressed in MICU1 knockout  
513 HEK 293T cells. Cells were transfected with MICU1-FLAG, MICU1  $\Delta$ K-FLAG or MICU1-  
514 S339E/K340E/K341E-FLAG plasmids (MICU1-EEE-FLAG). Lysates and elutes were  
515 immunoblotted with anti-FLAG, MCU, MICU2 or  $\beta$ -actin. Mean  $\pm$  SEM,  $n \geq 3$  independent  
516 measurements. **(F)** The mitochondrial  $\text{Ca}^{2+}$  uptake of EMRE mutants at EMRE C-terminal. EMRE  
517 KO cells transiently expressing C-terminal strep tagged EMRE, or strep tagged EMRE  $\Delta$ 93-107 were  
518 given a  $\sim 40 \mu\text{M}$   $\text{Ca}^{2+}$  pulse. EMRE  $\Delta$ 93-107 (colored purple) suppresses channel function compared  
519 with wild-type EMRE (colored black) expressed in EMRE KO cells. Representative traces are shown  
520 on the left and bar graph in the right (mean  $\pm$  SEM,  $n \geq 3$  independent measurements). Western blot  
521 of cell lysates from the different groups were performed to make sure that EMRE expression was  
522 similar by using antibody to strep.  $\beta$ -actin was used as the loading control.

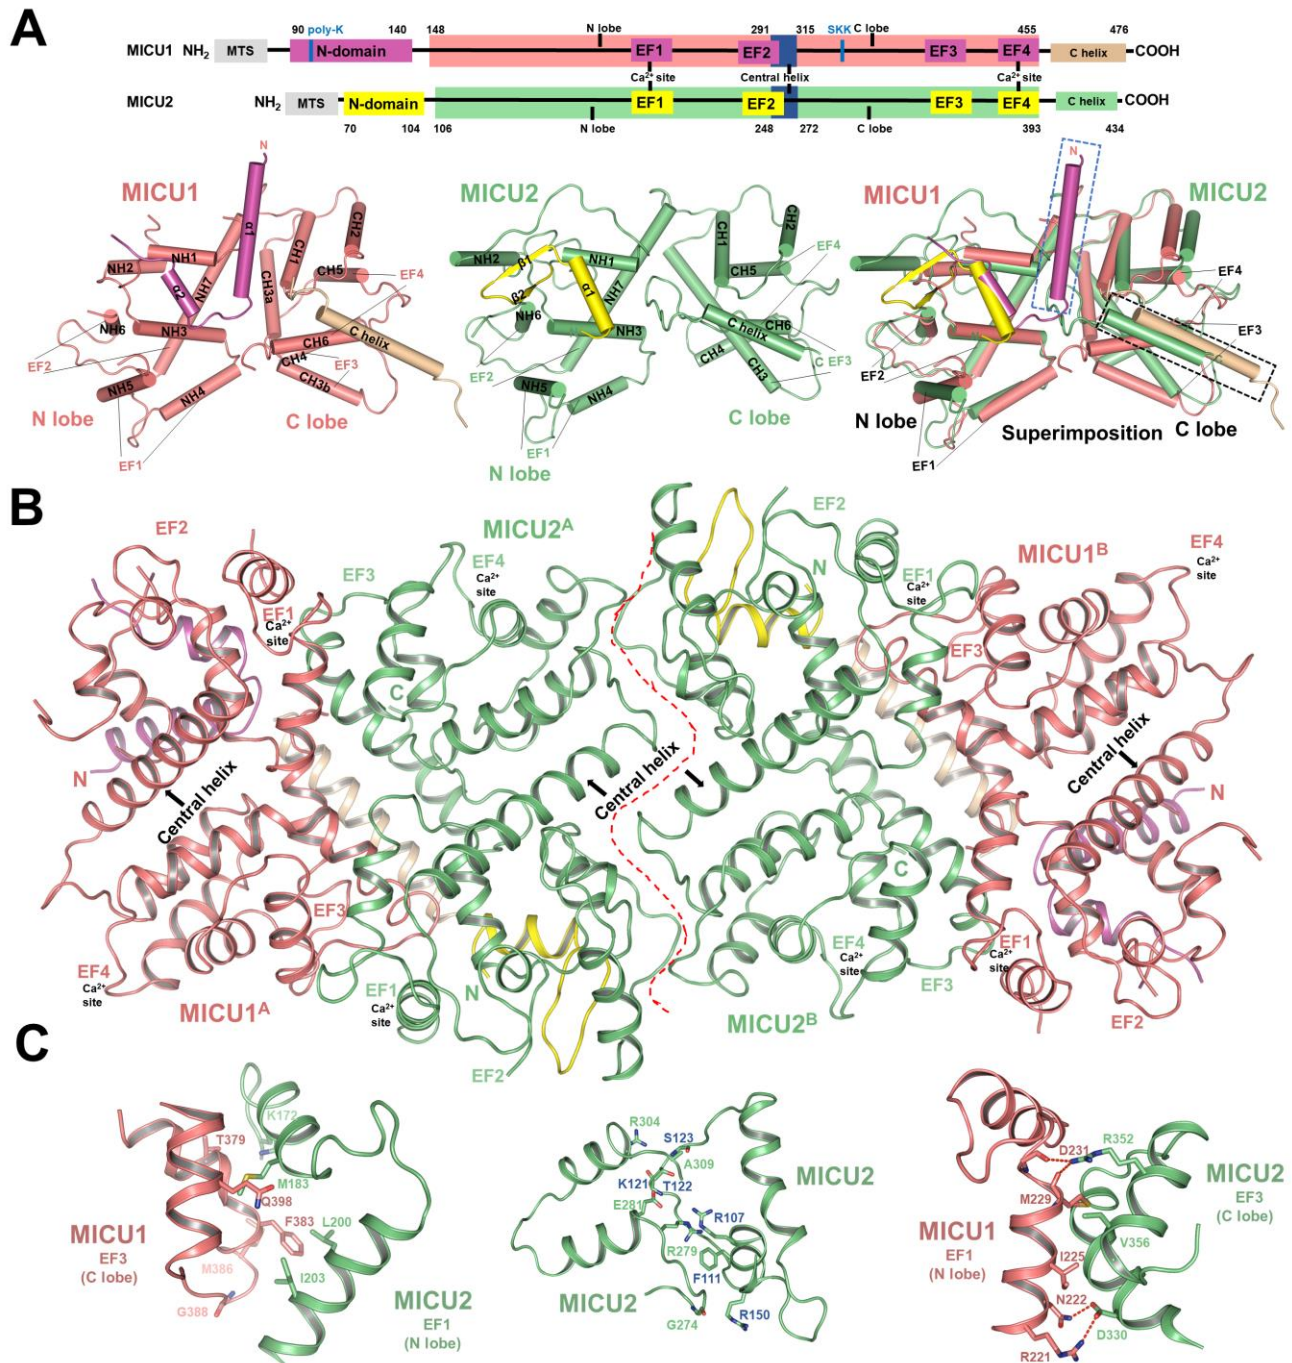

523

524 **Fig. 3. MICUs in the MEMMS.**

525 (A) Schematic domain organization (top), individual cartoon representation (lower left and middle  
 526 panel) and superimposition (lower right) of the overall structure of MICU1 (the N-domain colored in  
 527 magenta, the main body colored in light-pink and C-terminal helix colored in wheat) and MICU2 (the  
 528 N-domain colored in yellow, the main body colored in light-green). The N-lobe, C-lobe, EF hand of  
 529 each protein are indicated. In the superimposed MICU1 and MICU2 structure, the blue dashed box  
 530 indicates the unique N-terminal helix of MICU1, the black dashed box indicates the C-terminal helix

531 of MICU1. N or C termini of each MICU1 or MICU2 monomers are indicated. **(B)** The ‘face-to-face’  
532 interaction between MICU1-MICU2 hetero-dimers and the ‘back-to-back’ interaction between two  
533 MICU2s. The colors are the same as in A, the central helix of each subunit is labeled. **(C)** Detailed  
534 interactions between MICU1 and MICU2. The left panel shows interactions between MICU1 C-  
535 terminal lobe and MICU2 N-terminal lobe. The middle panel shows interactions within MICU2  
536 homodimer. The right panel shows interactions between MICU1 N-terminal lobe and MICU2 C-  
537 terminal lobe. Hydrogen bonds are indicated as red dash lines. The oxygen and nitrogen atoms are  
538 colored red and blue, respectively.

539

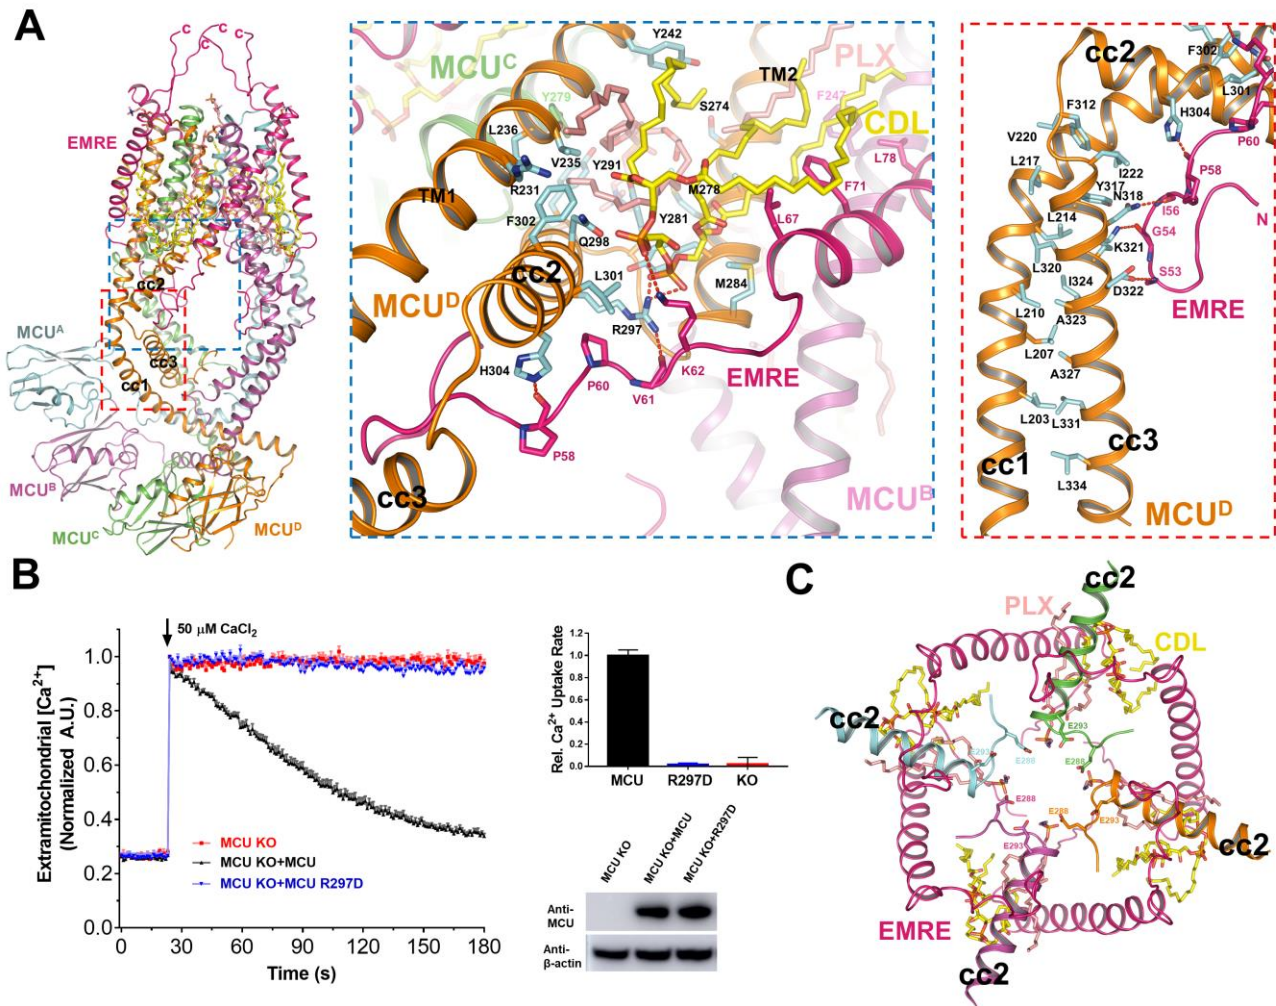

540

541 **Fig. 4. Interactions within the matrix gate of MCU.**

542 (A) Detailed interactions within the matrix gate of MCU complex. The blue dashed box indicates  
 543 interactions between CDL and surrounding subunits, including two MCU subunits (colored magenta  
 544 and orange, respectively) and one EMRE subunit (colored red), and interactions between the N-  
 545 terminal of EMRE and cc2 of MCU. The red dashed box indicates the stable hydrophobic interface  
 546 between MCU cc1 and cc3. Residues responsible for interactions are shown as sticks. Hydrogen bonds  
 547 are shown as red dashed lines. (B) Mitochondrial Ca<sup>2+</sup> uptake phenotype in R297D mutant of MCU.  
 548 MCU KO cells transiently expressing MCU, or MCU R297D were given a ~40 μM Ca<sup>2+</sup> pulse. R297D  
 549 (colored blue) completely abolished the channel function. Representative traces are shown on the  
 550 upper and bar graph in the bottom (mean ± SEM, n ≥ 3 independent measurements). Western blot of  
 551 cell lysates from the different groups were performed to make sure the total amounts of protein  
 552 expression were constant by using antibody to MCU. β-actin was used as the loading control. (C)

553 Intrusion of the PLXs, CDLs and MCU cc2s into the central  $\text{Ca}^{2+}$  channel. Glu<sup>288</sup>s and Glu<sup>293</sup>s on cc2  
554 are shown as sticks. EMREs, cc2, PLXs and CDLs are colored A.  
555



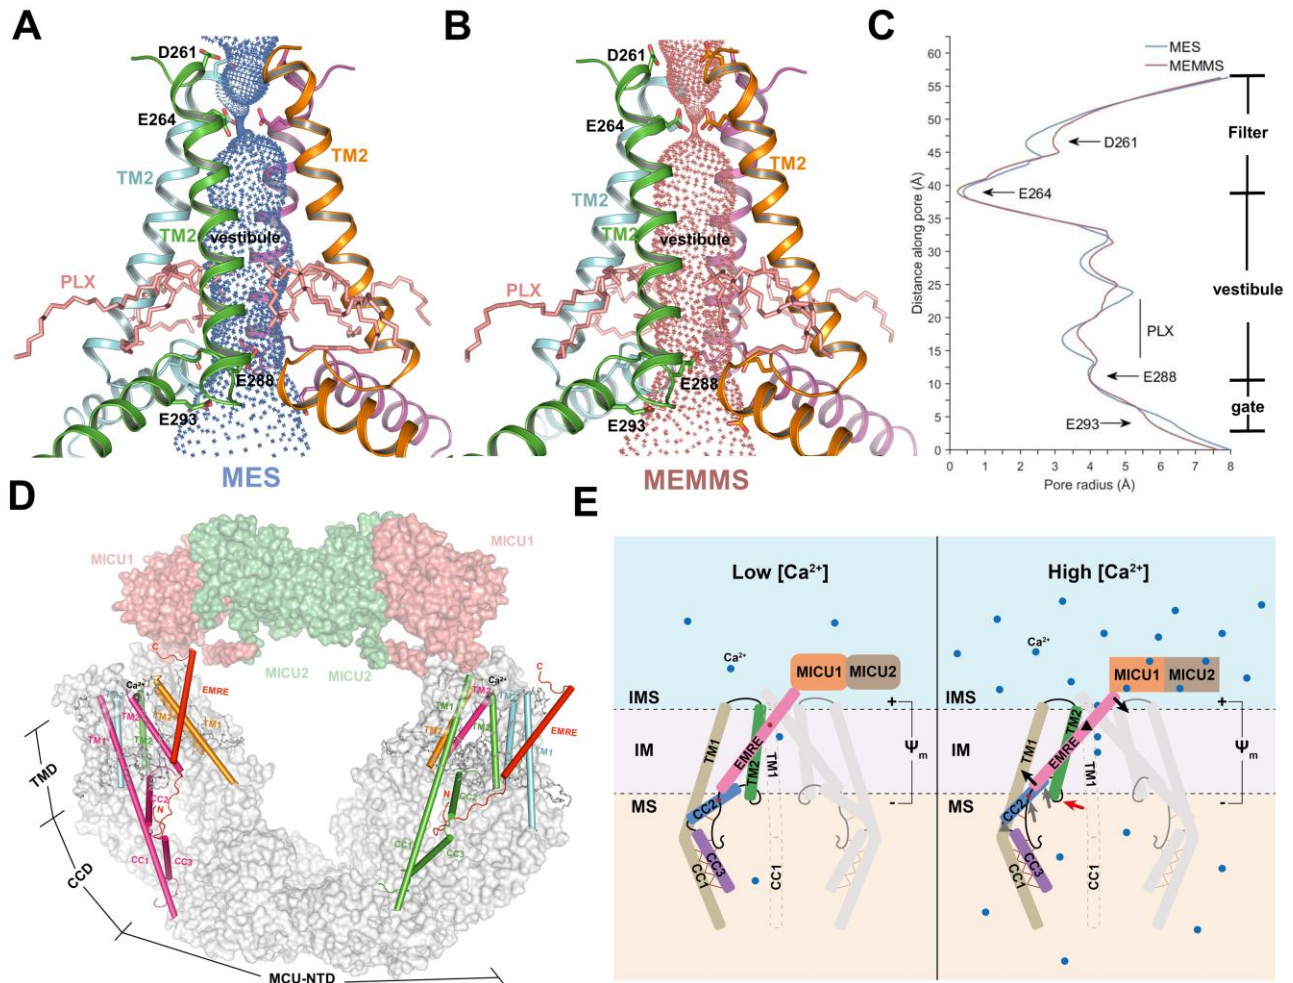

556

557 **Fig 5. Comparison of pore profile in MES and MEMMS, and a proposed model of MCU**  
 558 **complex regulation.**

559 (A) Cartoon model of the transmembrane pore of MES with the ion conduction pathway rendered in  
 560 blue mesh. Asp<sup>261</sup> and Glu<sup>264</sup> at the entrance, and Glu<sup>288</sup> and Glu<sup>293</sup> at the exit of Ca<sup>2+</sup> channel are  
 561 shown as sticks. PLXs are shown as salmon sticks. (B) Cartoon model of the transmembrane pore of  
 562 MEMMS with the ion conduction pathway rendered in brown mesh. Asp<sup>261</sup> and Glu<sup>264</sup> at the entrance,  
 563 and Glu<sup>288</sup> and Glu<sup>293</sup> at the exit of Ca<sup>2+</sup> channel are shown as sticks. PLXs are shown as salmon sticks.  
 564 (C) Pore radius along the ion conduction pathway of MES and MEMMS. Filter, vestibule and gate are  
 565 indicated, the gate residues and PLX are labeled. (D) EMRE anchors on the TM1 of an MCU, while  
 566 the N-terminal interacts with the cc2 and cc3 of the neighboring MCU in the matrix, and the C-terminal  
 567 interacts with MICU1 in the IMS, thus linking up MICU and MCU. All TM2 of MCU, typical TM1  
 568 and neighboring CCD domain are shown as cylindrical helices, the rest of MEMMS are shown as  
 569 surface. (E) Proposed model of how EMRE and MICU regulate the conductivity of MCU

570 supercomplex. Two sets of imagined levers are shown. EMRE is the first lever, with its pivot on TM1,  
571 its C-terminal loop attached to MICU1, and its N-terminal loop attached to CCD. cc2 is the second  
572 lever, with its pivot on the loop linking cc2 and cc3, its N-terminal attached to TM2, and its Arg<sup>297</sup>  
573 attached to EMRE. Arg<sup>297</sup> functions as the point of contact between the first and the second levers.  
574 Pivot and movement of the first lever is indicated by black triangle and arrows, respectively. Pivot and  
575 movement of the second lever is indicated by gray triangle and arrows, respectively. The movement  
576 of TM2 is marked by a red arrow. MICU1/2 conformational change is represented by a shape change.  
577 Membrane and membrane potential are labeled. The left panel is the low [Ca<sup>2+</sup>]; the right panel is the  
578 high [Ca<sup>2+</sup>]. IMS, intermembrane space; IM, inner membrane; MS, matrix.

## Materials and Methods

### Co-expression of human mitochondrial Ca<sup>2+</sup> uniporter supercomplex

The optimized coding DNAs for *H.sapiens mcu* (Uniprot: Q8NE86), *mcub* (Uniprot: Q9NWR8), *micu1* (Uniprot: Q9BPX6), *micu2* (Uniprot: Q8IYU8) and *emre* (Uniprot: Q9H4I9 ) were synthesis in GenScript and cloned into the pEG BacMam vector (51), with tandem twin Strep-tag or FLAG tag at the C terminus of these five proteins. The BacMam viruses were produced and amplified in Sf9 cells. After extensively biochemical studies, we obtained the high quality and quantity protein complexes with the combination of the EMRE C-terminus tagged and the other four subunits without tags viruses. For larger amount protein purification, four liters of the HEK 293F cells were cultured. When the cell density reached  $2 \times 10^6$  cells per mL, the cells was transfected with the P3 (the third passage) BacMam viruses of MCU, MICU1, MICU2, MCUB and EMRE, each at 8 mL per liter cell culture. Transfected cells were cultured for 48 hours before harvesting. To capture the supercomplex in low [Ca<sup>2+</sup>], 0.1 mM EGTA was added into the medium and the cells were cultured for at least 1 hour before the same virus transfected.

### Purification of the human mitochondrial Ca<sup>2+</sup> uniporter supercomplex

All procedures were carried out at 4°C. To purify the MES complex, four liters of transfected cells were harvested, washed with 1×PBS and resuspended in 10 mM Tris pH 7.4, 225 mM sorbitol, 60 mM sucrose, 2 mM CaCl<sub>2</sub> and 0.1% BSA, 1 mM PMSF. The suspension was homogenized by a soft blender for 150 s and the homogenate was centrifuged at 3,000 g for 10 min. Supernatant was further centrifuged at 20,000 g for 45 min to obtain the crude mitochondria. The pellet was suspended and extracted in 25 mM Tris pH 7.8, 150 mM NaCl, 2 mM CaCl<sub>2</sub> with 1% digitonin. After incubation for an hour, the extraction was centrifuged at 20,000 g for 20 min at 4°C and the supernatant was applied to Strep-Tactin Sepharose by gravity at 4°C. The resin was washed three times with W buffer, which contained 25 mM Tris pH 7.8, 150 mM NaCl, 2 mM CaCl<sub>2</sub> with 0.1% digitonin. The target proteins were eluted with W buffer plus 5 mM desthiobiotin, concentrated to 100 μL by 100 kDa cut-off centrifugal filter (Millipore) and further purified by Superdex200 increase 5/150 GL also in W buffer. To obtain the MEMMS complex, the same protocol was used with some modification: 2 mM CaCl<sub>2</sub> in all the buffer was replaced by 0.1 mM EGTA. The peak fractions were collected for EM sample

preparation, the presence of the complex was verified by Blue Native-PAGE and confirmed by mass spectrometry.

### **Sample preparation and cryo-EM data acquisition**

4  $\mu\text{L}$  aliquots of freshly purified MES or MEMMS at a concentration of 5 mg/mL were placed on glow-discharged 400-mesh Quantifoil R1.2/1.3 grids (Quantifoil, Micro Tools GmbH, Germany). Grids were blotted for 5 s and flash-frozen in liquid ethane using an FEI Mark IV Vitrobot operated at 8°C and 100% humidity. The grids were transferred to a Titan Krios (FEI) electron microscope equipped with a Cs corrector, operating at a voltage of 300 kV. Images were recorded by a K2 Summit direct electron detector (Gatan, Inc.) equipped with a GIF Quantum energy filter (slit width 20 eV) in the super-resolution counting mode. Data acquisition was performed using AutoEMation II with a nominal magnification of 105,000 times, which yields a super-resolution pixel size of 0.5455 Å on image plane, and with defocus ranging from -1.5  $\mu\text{m}$  to -2.0  $\mu\text{m}$ . The dose rate on the detector was ~8.0 counts per pixel per second with a frame exposure time of 0.175 second and a total exposure time of 5.6 seconds. Each micrograph stack contains 32 frames. The total dose rate was approximately 50  $\text{e}^-/\text{Å}^2$  for each micrograph.

### **Image processing**

A simplified flowchart of the procedure for image processing of MES is presented in [fig. S2A](#). A total of 4,997 cryo-EM movie stacks were automated collected. The motion correction was performed using MotionCor2 (52) with 2×2 binning, resulting in a pixel size of 1.091 Å, and meanwhile, dose weighting was performed, yielding motion-corrected integrated images for further processing. After whole image CTF estimation using CTFFIND3, 4,706 good micrographs were manually selected from the dataset (53). A total of 471,401 particles were auto-picked using RELION-3.0 (30). After several rounds of two-dimensional (2D) classification, 327,716 particles were selected for further three-dimensional (3D) analysis. A total of 19,739 particles from the first 500 micrographs were used to generate initial models for the first round of 3D classification using RELION-3.0. Multi-reference 3D classification was performed for the 327,716 particles and 89,734 particles were selected then subjected to 3D refinement. Each particle was recentered using the in-plane translations measured in 3D refinement and re-extracted from the motion-corrected integrated micrographs. Gctf (54) was used to refine the local

defocus parameters. The well centered particles with more accurate defocus parameters were subjected to 3D refinement without symmetry, which resulted in an electron density map at 3.67 Å resolution. The 3.67 Å map was fitted into a copy of itself rotated by 180° using Chimera (55), confirming a C2 symmetry in this map. Another round of 3D refinement with C2 symmetry was performed and yield a map at 3.51 Å resolution.

The 89,734 particles were further classified in to three classes using masked local angular search 3D classification with a step size of 0.9° and a local search range of 5°. Particles from two classes, which were in relatively good quality but slightly varied in the separation angle of the two MCU-EMRE hetero-octamer, were further refined and yield two maps at 4.18 Å and 3.41 Å resolution, respectively. To improve the density of N-terminal domains (NTDs), 3D refinement with a focused mask was performed for the 46,879 particles in the class of higher resolution, resulting in a focused map with a resolution of 3.27 Å after post processing. Since the density of the hetero-octamer transmembrane domain (TMD) and coiled-coil domain (CCD) of all the three classes could perfectly fit in each other, the 89,734 particles before the 3D classification were expanded according to C2 symmetry using `reliion_particle_symmetry_expand`, then subtracted by the density of one NTD and the other whole hetero-octamer using RELION-3.0. The 179,468 subtracted particles were subjected to 3D refinement with a soft mask without symmetry, resulting in a focused map with a resolution of 3.27 Å after post processing. The focused map of NTDs and two copies of the focused map of TMD+CCD were fit into the 3.41 Å map then combined using PHENIX (32) Combine Focused Maps, resulting in the final map. The reported resolutions are based on the gold-standard Fourier shell correlation 0.143 criterion (56). All density maps were sharpened by applying a negative B-factor that was estimated using automated procedures (57). Local resolution variations were estimated using Resmap (58).

A simplified flowchart of the procedure for image processing of MEMMS is presented in [fig. S2B](#). A total of 9,899 cryo-EM movie stacks were motion corrected, 2×2 binned and dose weighted using MotionCor2. After whole image CTF estimation using CTFFIND3, 9,113 good micrographs were manually selected from the dataset. A total of 986,805 particles were autopicked using RELION-3.0. After several rounds of 2D classification, 699,244 particles were selected and subjected to 3D classification, using the MES 3.41 Å map low-pass filtered to 50 Å as the initial model. After 3D

classification, 250,977 particles of the class with an additional “cap” comparing to MES were selected then subjected to 3D refinement. Each particle was recentered and re-extracted from the motion-corrected integrated micrographs. Gctf was used to refine the local defocus parameters. The re-extracted particles were subjected to 3D refinement without symmetry, which resulted in a map at 4.09 Å resolution.

The 250,977 particles were further classified into three classes using masked skip-alignment 3D classification. A total of 45,864 particles of the class with clear “cap” were subjected to 3D refinement with a soft mask then yield a map at 3.64 Å resolution. Since the density of the MICUs (i.e. the “cap”) is still fragmentary, these particles were subtracted by the density of MES in the 3.64 Å map of MEMMS using RELION-3.0 and subjected to 3D refinement. Then 33,930 particles were selected after a final round of 3D classification and subjected to 3D refinement with a soft mask and C2 symmetry, leading to a reconstruction of MICUs at 3.71 Å resolution with much better density. To improve the density of NTDs, the 45,864 particles were subtracted by the density of CCDs, TMDs and MICUs, then subjected to 3D refinement with a soft mask and C2 symmetry, resulting in a density map of NTDs at 3.39 Å resolution. In order to improve the density of TMD+CCD, the 45,864 particles were expanded according to C2 symmetry using `relion_particle_symmetry_expand`, subtracted by the density of the rest part beside TMD+CCD, then subjected to 3D refinement with a soft mask. Eventually, the resolution of TMD+CCD was improved to 3.30 Å. The focused map of NTDs, MICUs and two copies of the focused map of TMD+CCD were fit into the 3.64 Å map then combined using PHENIX Combine Focused Maps, resulting in the final map.

The reported resolutions are based on the gold-standard Fourier shell correlation 0.143 criterion. All density maps were sharpened by applying a negative B-factor that was estimated using automated procedures. Local resolution variations were estimated using Resmap.

### **Model building and refinement and validation**

The atomic model of MES was manually built and adjusted in COOT (31). And then, the model with the ligands were subjected to global refinement and minimization in real space refinement using PHENIX with secondary structure and NCS restraints. The crystal structure of MICU1 (PDB 4NSC) and MICU2 (PDB 6AGH) were used as the initial models for MICUs in MEMMS. The model was

refined in real space using PHENIX with secondary structure and NCS restraints. The final atomic models were evaluated using MolProbity (59). Pore radii were calculated using the HOLE program (60). All the figures were prepared in PyMol (61).

### **Gene knockout by CRISPR/Cas9**

Gene knockout by CRISPR/Cas9 was performed using a previously described protocol (62). Two sets of guide RNA sequences were designed. Guide sequences used for gene knockout were as follows: MCU-KO1: CAGGAGCGATCTACCTGCGG; MCU-KO2: TGAAGTACAGCGTTCACGC; EMRE-KO1: GGCTAGTATTGGCACCCGTC; EMRE-KO2: TACTAGCCAGCGAGCCGCTC; MICU1-KO1: AAACCAGTATGGGTATGCGC; MICU1-KO2: CGAATTCAGCGTAAACTGC; MICU2-KO1: CAGCCGCGTCAGTGTTGCGG; MICU2-KO2: TGGGGCGGAAAAGTGGGACG. After sequencing, HEK 293T cells were transfected transiently with pSpCas9(BB)-2A-GFP plasmid which contained the corresponding guide sequence. Single cell was isolated by flow cytometry 24 hours later and proliferated for 2 weeks. Gene knockout was confirmed by sequencing and western blot.

### **Co-immunoprecipitation and western blot**

All co-immunoprecipitation experiments were performed at 4°C. In brief, related HEK 293T knockout cells at 80%-90% confluence were transfected with 15 µg corresponding plasmids using lipofectamine 2000 (Thermo Fisher Scientific) and grown in a 37°C CO<sub>2</sub> incubator for 24 hours. Transfected cells were lysed in 1 mL lysis buffer (25 mM Tris pH 7.8, 150 mM NaCl, 1 mM EGTA, cOmplete protease inhibitors) with 1% digitonin. The cell lysate was incubated for 30 min on ice and centrifuged for 10 min at 4°C at 20000 g. A small portion of the sample was used for whole cell lysate analysis and the rest was collected and incubated with anti-FLAG magnetic agarose (Thermo Fisher Scientific) for two hours in 4°C. The beads were collected on a magnet, washed three times with 1 mL lysis buffer which contained 0.1% digitonin, and eluted with 150 µL SDS-gel loading buffer for western blot.

For western blot analysis, proteins were subjected on a 4-20% SDS-PAGE gel (GenScript) and transferred onto a PVDF membrane (Millipore). Membranes were detected with the indicated antibodies. The primary antibodies were used: MCU (Abcam), MICU1 (Sigma-Aldrich), MICU2 (Sigma-Aldrich), FLAG (Easybio), Strep (Easybio), Mouse-β-actin (Easybio).

### **Mitochondrial Ca<sup>2+</sup> uptake assays**

Mitochondrial Ca<sup>2+</sup> uptake was performed on MCU KO (MCU<sup>-/-</sup>), or EMRE KO (EMRE<sup>-/-</sup>) HEK 293T following the published protocol (42). Briefly, the transfected cells were digested, washed with 10 mL PBS for three times and re-suspended in buffer (25 mM HEPES pH 7.4, 125 mM KCl, 2 mM KH<sub>2</sub>PO<sub>4</sub>, 1 mM MgCl<sub>2</sub>, 10 μM EGTA, 5 mM glutamate, 5 mM malate, 3 μM thapsigargin, 0.005% digitonin, 1 μM Oregon Green-Bapta6F) to a final concentration of 10×10<sup>6</sup> cells per mL. 150 μL cell suspension was transferred into a 96-well plate (Corning). Fluorescence was recorded using a Perkin/Elmer plate reader with excitation 488 nm/emission 535 nm before and after Ca<sup>2+</sup> injection. 50 μM CaCl<sub>2</sub> was injected, resulting in about 40 μM free Ca<sup>2+</sup>. The relative Ca<sup>2+</sup> uptake rate is reported as the linear fit of the fluorescence for 3 minutes. In order to normalize the fluorescence readout, the maximal fluorescence value was set to 1.0 and the other fluorescence values at each time point were divided by the maximal fluorescence. The relative rate of Ca<sup>2+</sup> uptake was analyzed in GraphPad Prism 7 (GraphPad Software, Inc.). Western blot was performed to ensure protein expression was comparable among the MCU or EMRE mutants in the uptake assay, Mouse anti-β-actin was used as a loading control.



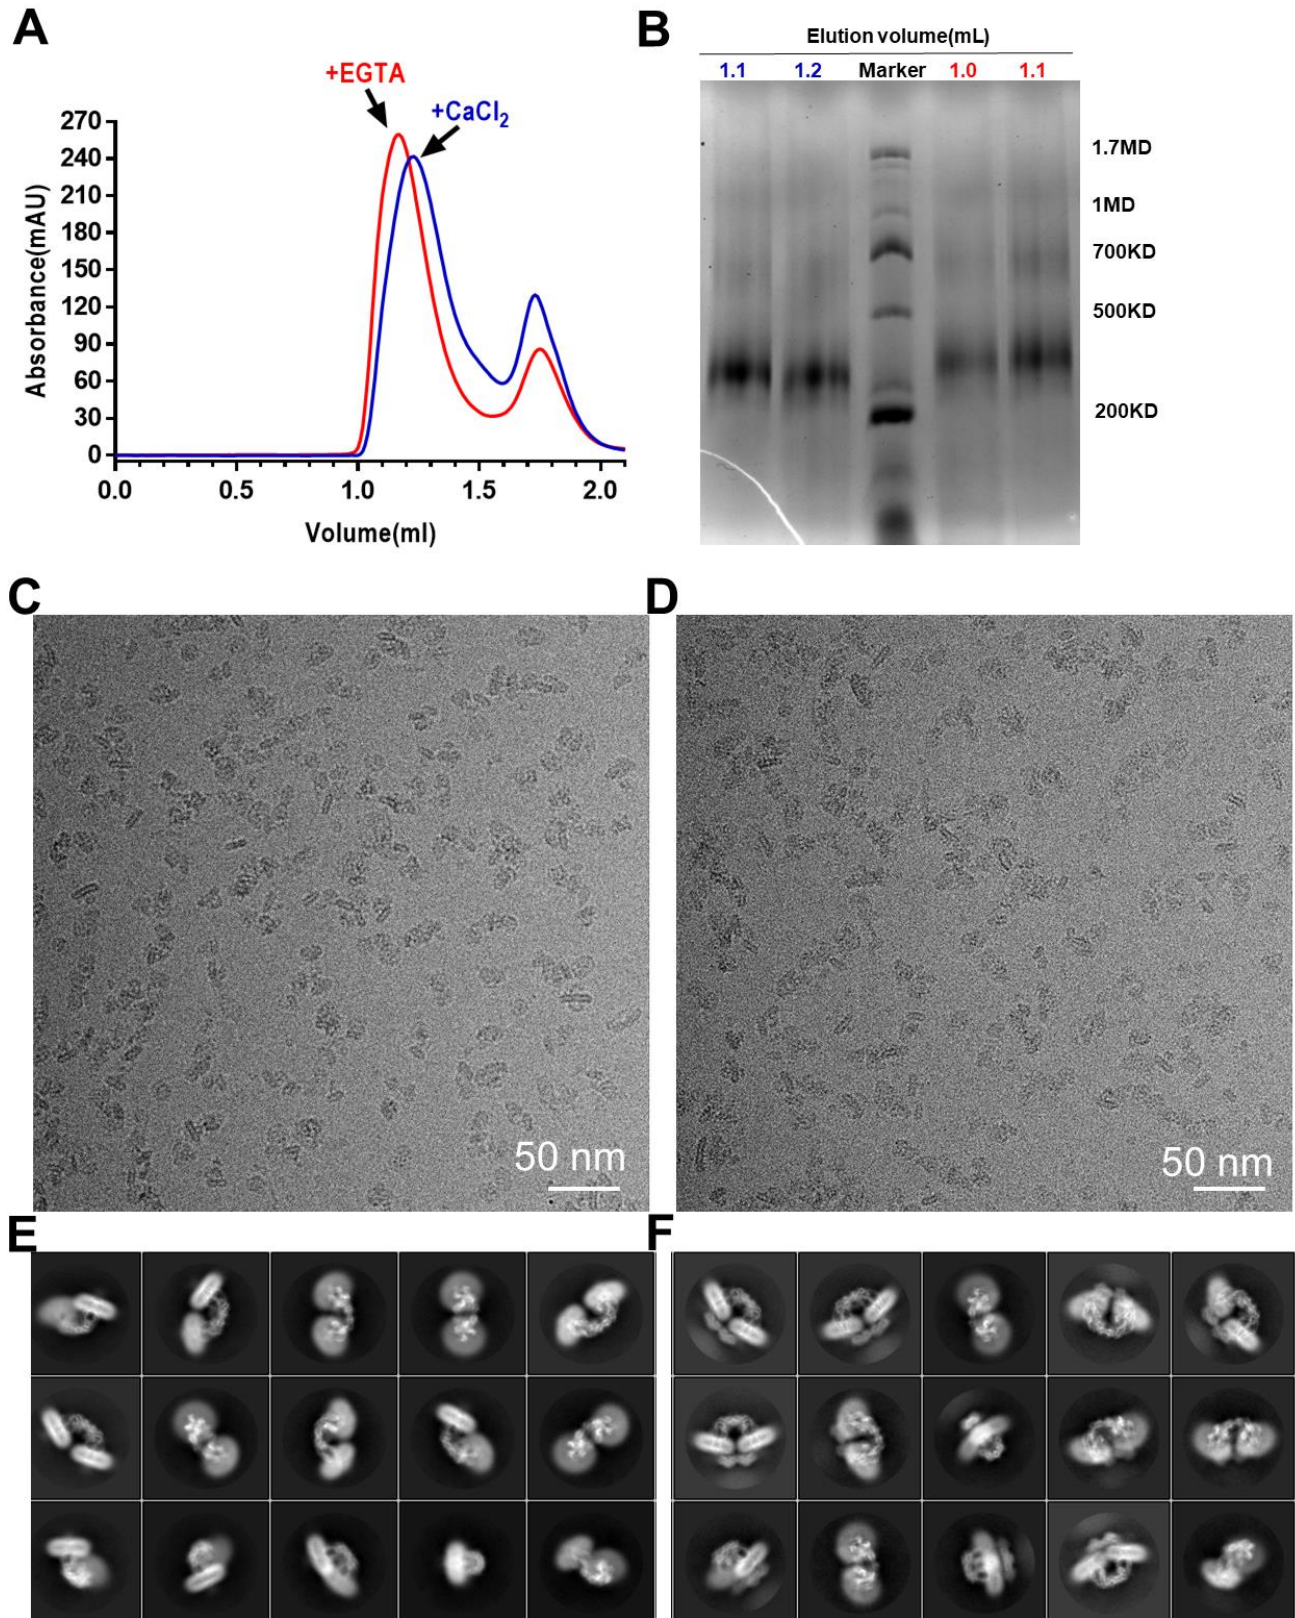

trace). (B) Protein samples of the MES and MEMMS size-exclusion chromatography fractions were subjected to BN-PAGE. Fractions of corresponded elution volume were used for cryo-EM sample preparation. (C) Representative micrograph of the MES. (D) Representative micrograph of the MEMMS. (E) 2-D class averages for the cryo-EM structure of MES. (F) 2-D class averages for the cryo-EM structure of MEMMS.

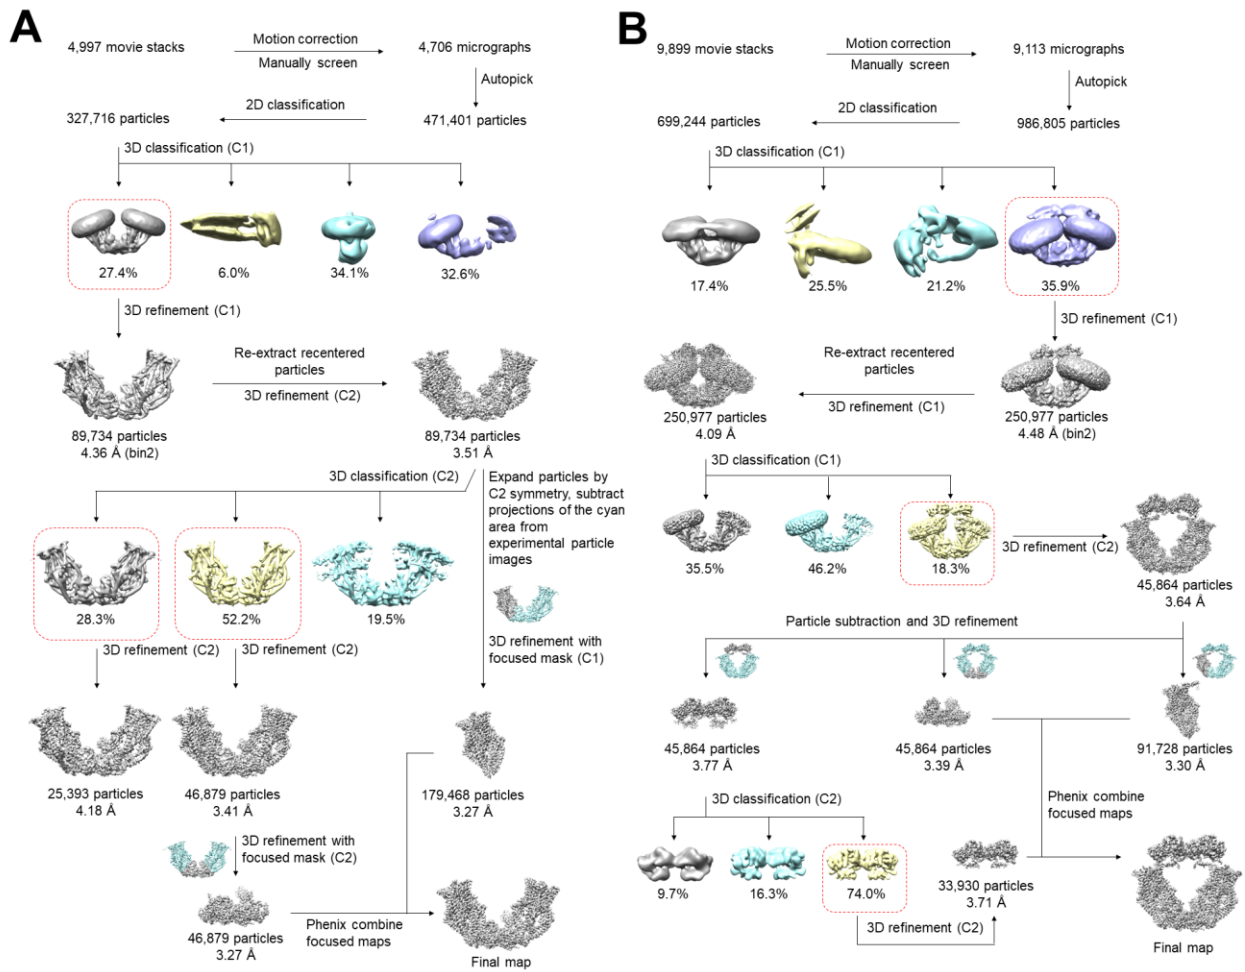

**Fig. S2. Flowchart of EM data processing of MES and MEMMS.**

Details of data processing are described in the ‘Image processing’ section of the Materials and Methods.

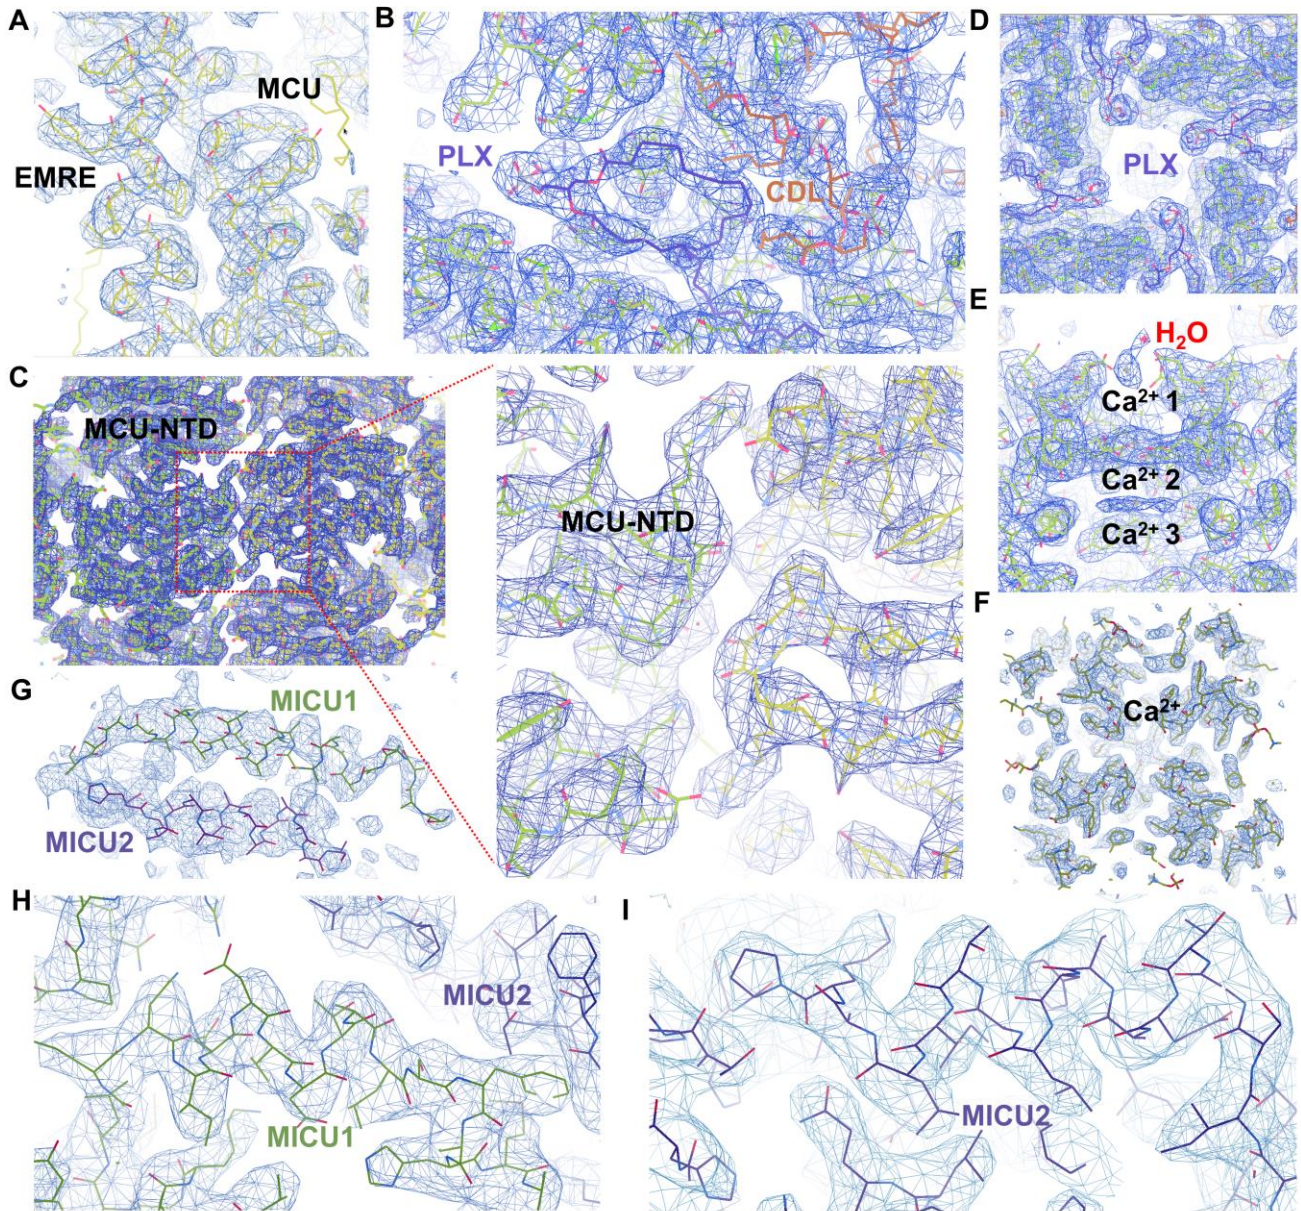

**Fig. S3. Representative density maps of MCU supercomplex.**

(A) Interaction between EMRE and MCU. (B) The electron densities of a PLX and a CDL. (C) Interaction between two MCU tetramers through three pairs of NTDs. (D) Polar heads of PLX intruding into central channel. (E) Entrance of central channel of MES. The density of three  $\text{Ca}^{2+}$  ions are shown. (F) Entrance of central channel of MEMMS. The density of one  $\text{Ca}^{2+}$  ion is shown. (G) C-terminal helix electron densities of MICU1 and MICU2. (H) Representative electron densities of interactions between MICU1 and MICU2. (I) Representative electron densities of MICU2.

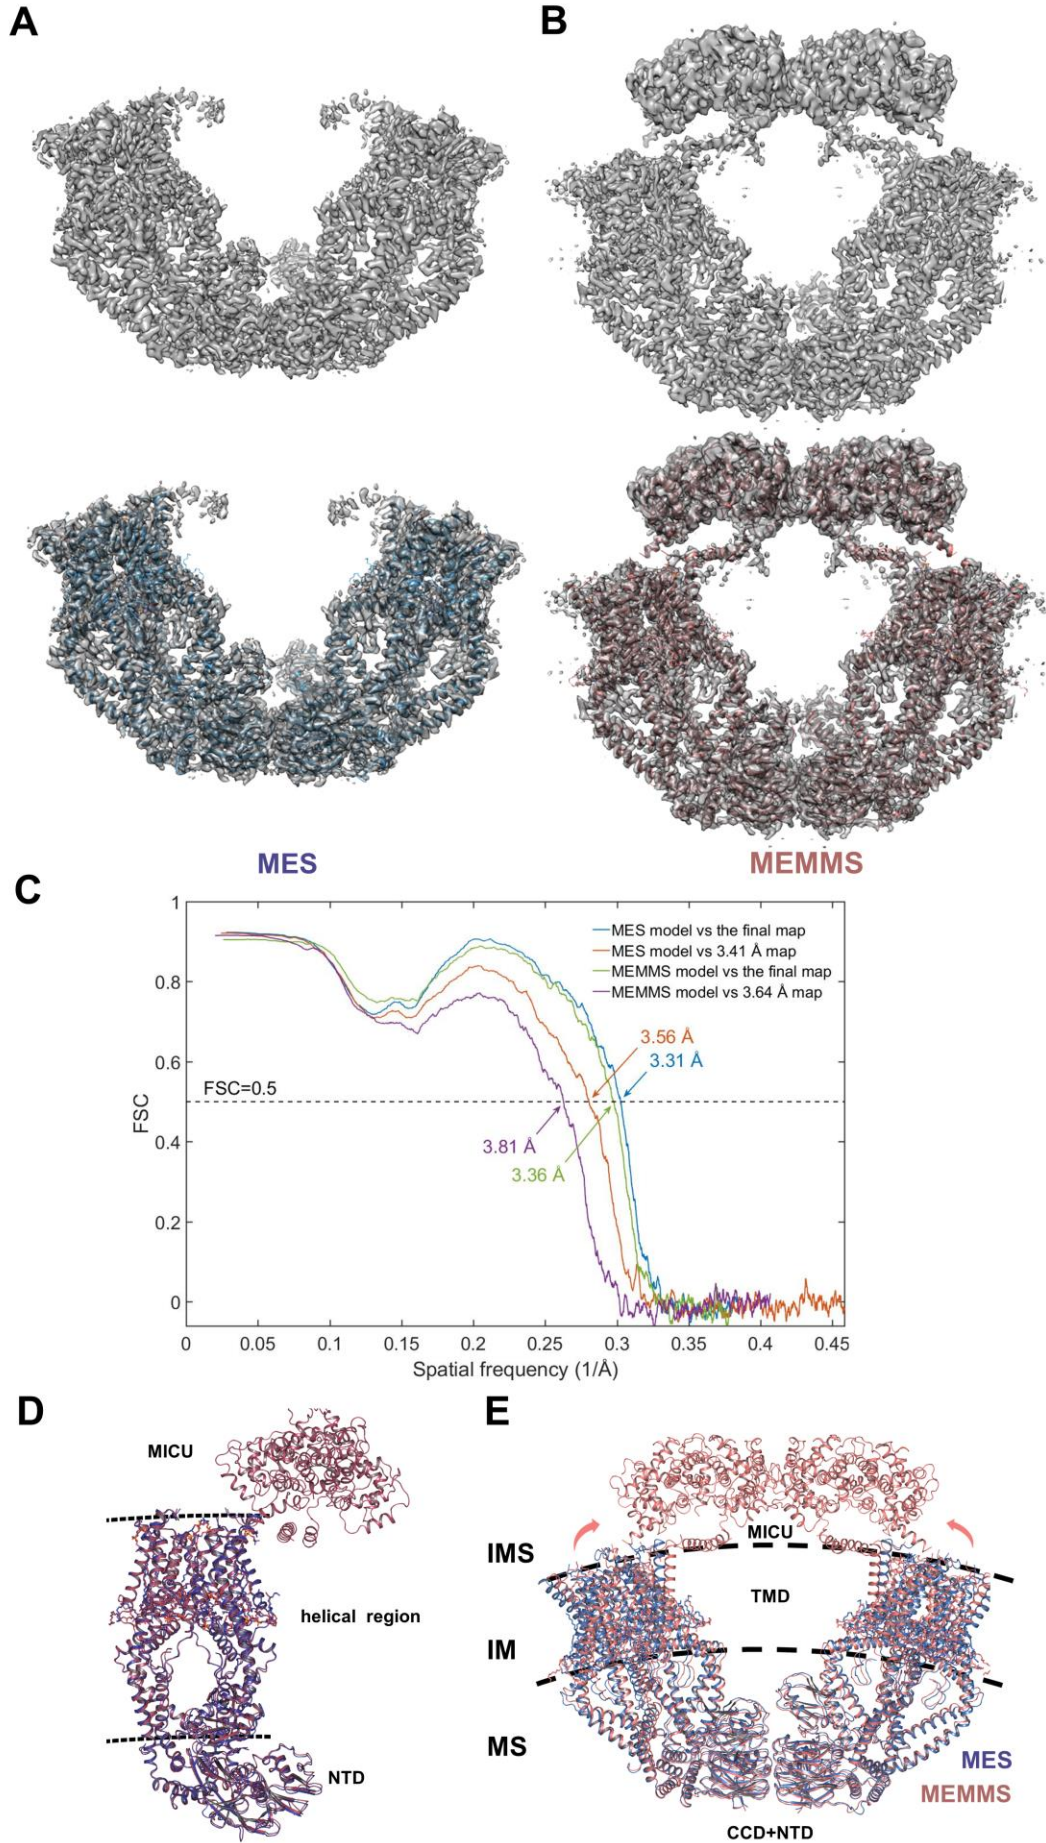

**Fig. S4. Model building of the MCU supercomplex.**

(A) Density map of MES viewed from membrane side (upper left). Merged density map and structural model of MES (lower left), model of MES is colored blue. (B) Density map of MEMMS viewed from membrane side (upper right). Merged density map and structural model of MEMMS (lower right), model of MEMMS is colored brown. (C) FSC curves of the refined model versus the final combined maps of MEMMS and MES that were refined against (blue) and the overall 3.64 Å and 3.41 Å map that were not refined against (orange), respectively. (D) Alignment of the MES octamer (blue) and the MEMMS decamer (brown). Membrane is indicated by two dashed lines. NTD, helical region and MICU is labeled. (E) Superimposition between MES and MEMMS. The overall structure of MEMMS is colored brown, and the overall structure of MES is colored blue. IMS, intermembrane space; IM, inner membrane; MS, matrix.



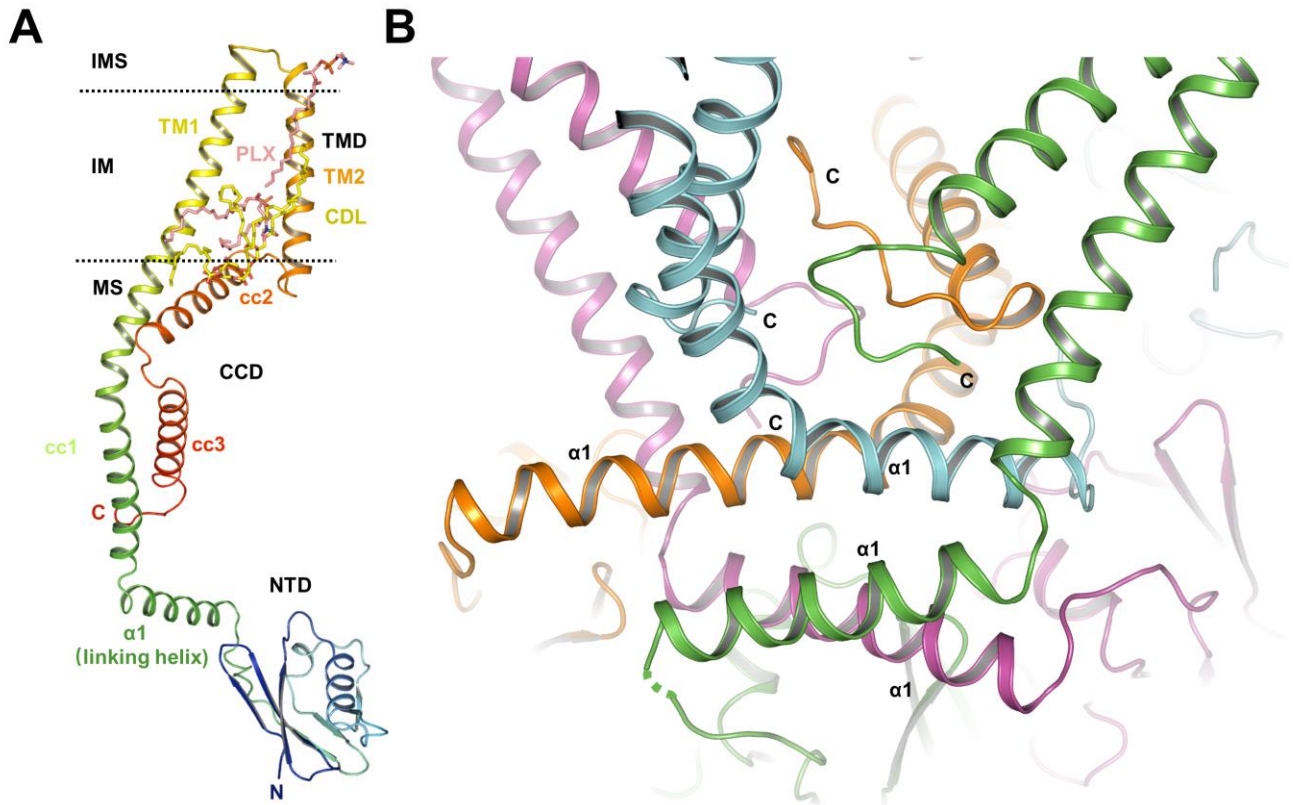

**Fig. S6. TMD, CCD and NTD of MCU.**

(A) Overall structure of the MCU monomer. Membrane is indicated by two dashed lines. TMD, transmembrane domain. CCD, coiled-coil domain. NTD, N-terminal domain. CDL and PLX are shown as sticks, colored in yellow and salmon respectively. MCU monomer is shown as cartoon and colored as rainbow. TM1 and TM2 form TMD. cc1, cc2, and cc3 form CCD. The linking helix  $\alpha 1$  links CCD and NTD. (B) Linking site between CCDs and NTDs of MCU tetramer. Helices from four monomers are distinguished by different colors. C termini of different MCU monomers are indicated. Four  $\alpha 1$ s stack into two layers stabilizing the matrix region.



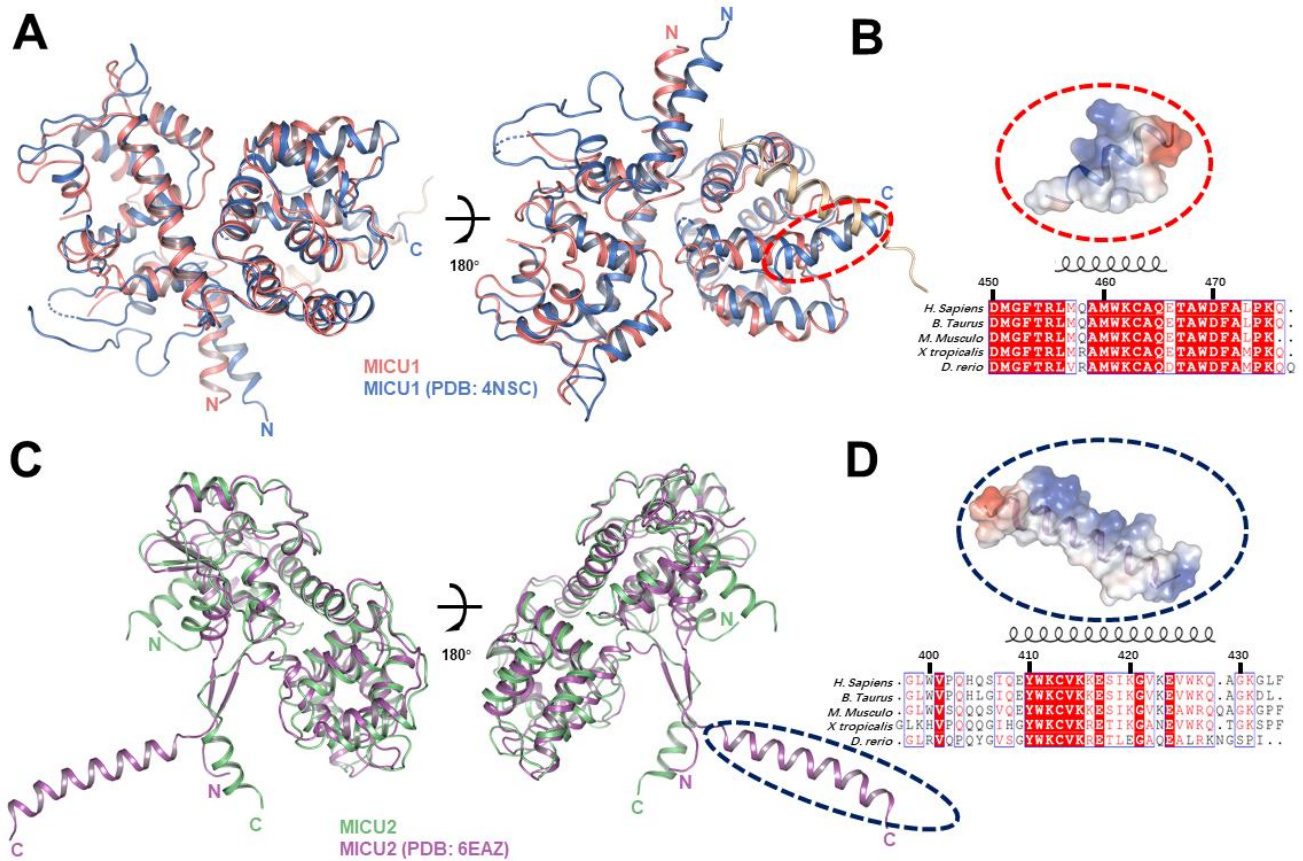

**Fig. S7. The C-terminal helix of MICU is important for MCU complex function.**

(A) Superimposition of MICU1 (colored in deep-salmon) in the MEMMS and hMICU1 in the  $\text{Ca}^{2+}$  free state (PDB 4NSC, colored in marine) in different views. 4NSC C-terminal helix is circled in red dashed line. (B) Surface electrostatic potential analysis of 4NSC C-terminal helix. The helix is positively charged on one side and hydrophobic on the other side. Amino acid sequences of *H.sapiens*, *B. taurus*, *M.musculus*, *X.tropicalis*, and *D.rerio* MICU1 C-terminal helix are aligned according to the ClustalW (Uniprot accession numbers: Q9H4I9, Q2M2S2, Q9DB10, Q28ED6, and A0A0J9YJ98, respectively). Secondary structure represented by ribbons is based on the C-terminal helix structure of 4NSC. Conserved residues among species are highlighted in red. (C) Superimposition of MICU2 (colored in lime-green) in the MEMMS and hMICU2 in the  $\text{Ca}^{2+}$  free state (PDB 6EAZ, colored in violet) in different views. 6EAZ C-terminal helix is circled in blue dashed line. (D) Surface electrostatic potential analysis of 6EAZ C-terminal helix. The helix is positively charged on one side and hydrophobic on the other side. Amino acid sequences of MICU2 C-terminal helix are aligned as in B. Secondary structure represented by ribbons is based on the C-terminal helix structure of 6EAZ. Conserved residues among species are highlighted in red.

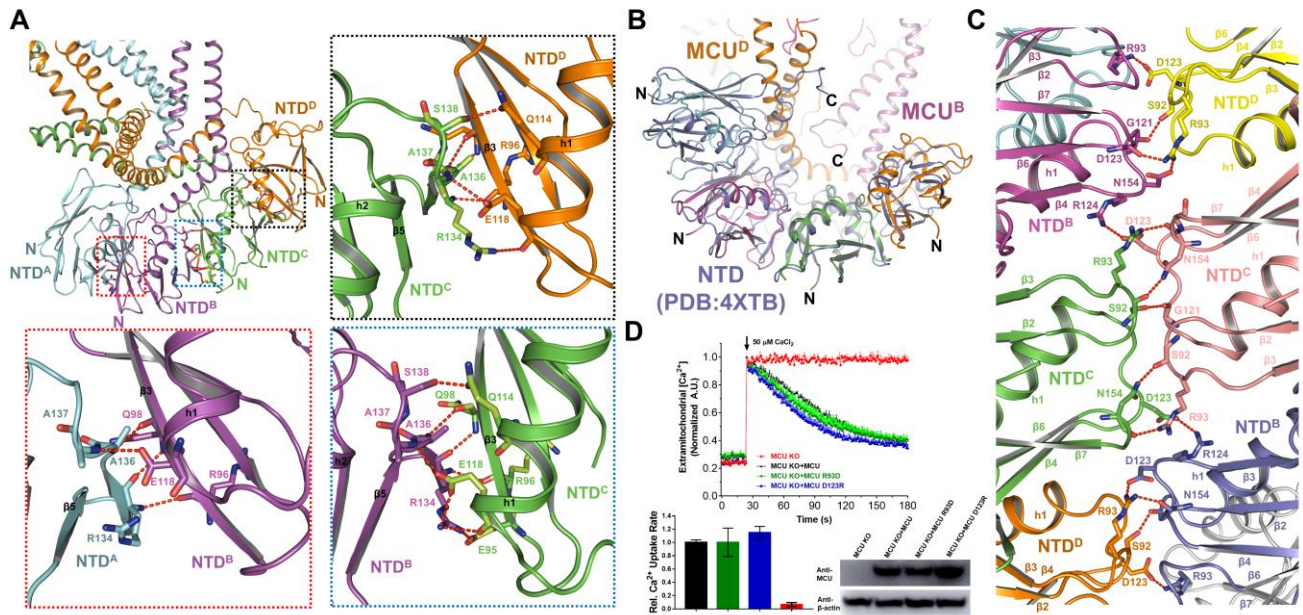

**Fig. S8. Interactions between NTDs of MCU in a crescent tail.**

(A) Four NTDs from the same MCU tetramer align to form a crescent tail. Four NTDs are distinguished by different colors, and labeled as NTD<sup>A</sup>, NTD<sup>B</sup>, NTD<sup>C</sup>, NTD<sup>D</sup>, respectively. N termini of MCU monomers are indicated. Three dashed boxes exaggerate three interacting sites between the four NTDs. Residues responsible for interaction are shown in stick. Hydrogen bonds are shown as red dashed lines.

(B) Alignment of the four NTDs from our structure and the four symmetrical NTDs in the crystal lattice from the previous crystal structure of human MCU<sup>NTD</sup> (PDB 4XTB). The NTD from the crystal structure is colored slate. The NTDs from different MCU subunits are distinguished by different colors.

(C) Interaction between three pairs of NTDs from two MCU tetramers. Residues responsible for interactions are shown as sticks. Hydrogen bonds are shown as red dashed lines.

(D) Mitochondrial Ca<sup>2+</sup> uptake in permeabilized cells expressing MCU mutants based on MCU NTD interactions in MES/MEMMS structures. MCU KO cells expressing MCU, MCU R93D, or MCU D123R were given a ~40 μM Ca<sup>2+</sup> pulse. Representative traces are shown on the upper and bar graph in the bottom. Western blot of cell lysates from the different groups were performed to make sure the MCU expression was similar, using antibody to MCU. β-actin was used as the loading control.

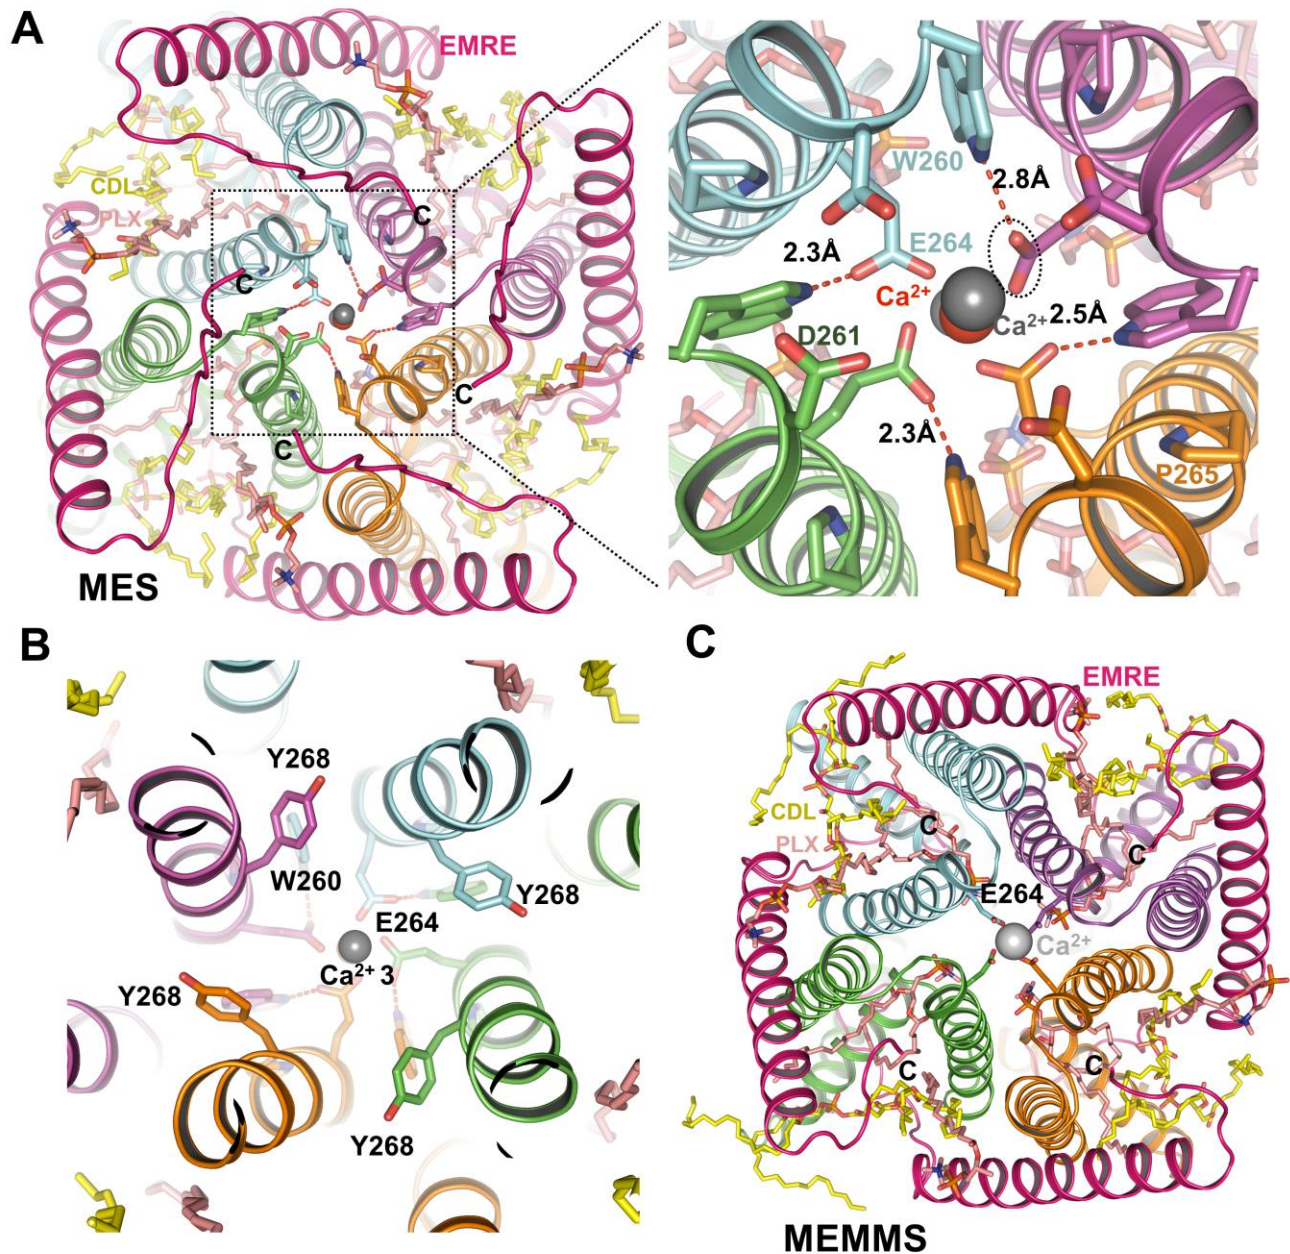

**Fig. S9. The entrance of  $\text{Ca}^{2+}$  channel of MES and MEMMS.**

(A)  $\text{Ca}^{2+}$  ion at the entrance of central channel of MES. The right panel is the zoomed-in image of left panel. The conserved residues in the selectivity filter are shown as sticks. Hydrogen bonds and their lengths are labelled.  $\text{Ca}^{2+}$  are shown as spheres.  $\text{Ca}^{2+}$  coordinating with Glu<sup>264</sup> is shown as red sphere. (B) Helices from 4 different MCU monomers in MES are distinguished by different colors, encircling the central channel, as viewed from matrix side. Tyr<sup>268</sup> is shown in stick point away from the central channel in our structure. Trp<sup>260</sup> and Glu<sup>264</sup> are also shown in stick. The third  $\text{Ca}^{2+}$  in the

central channel are shown in sphere. (C) The sole  $\text{Ca}^{2+}$  ion coordinated by Glu<sup>264</sup> residues is shown in the MEMMS structure, as viewed from the cytosolic side.

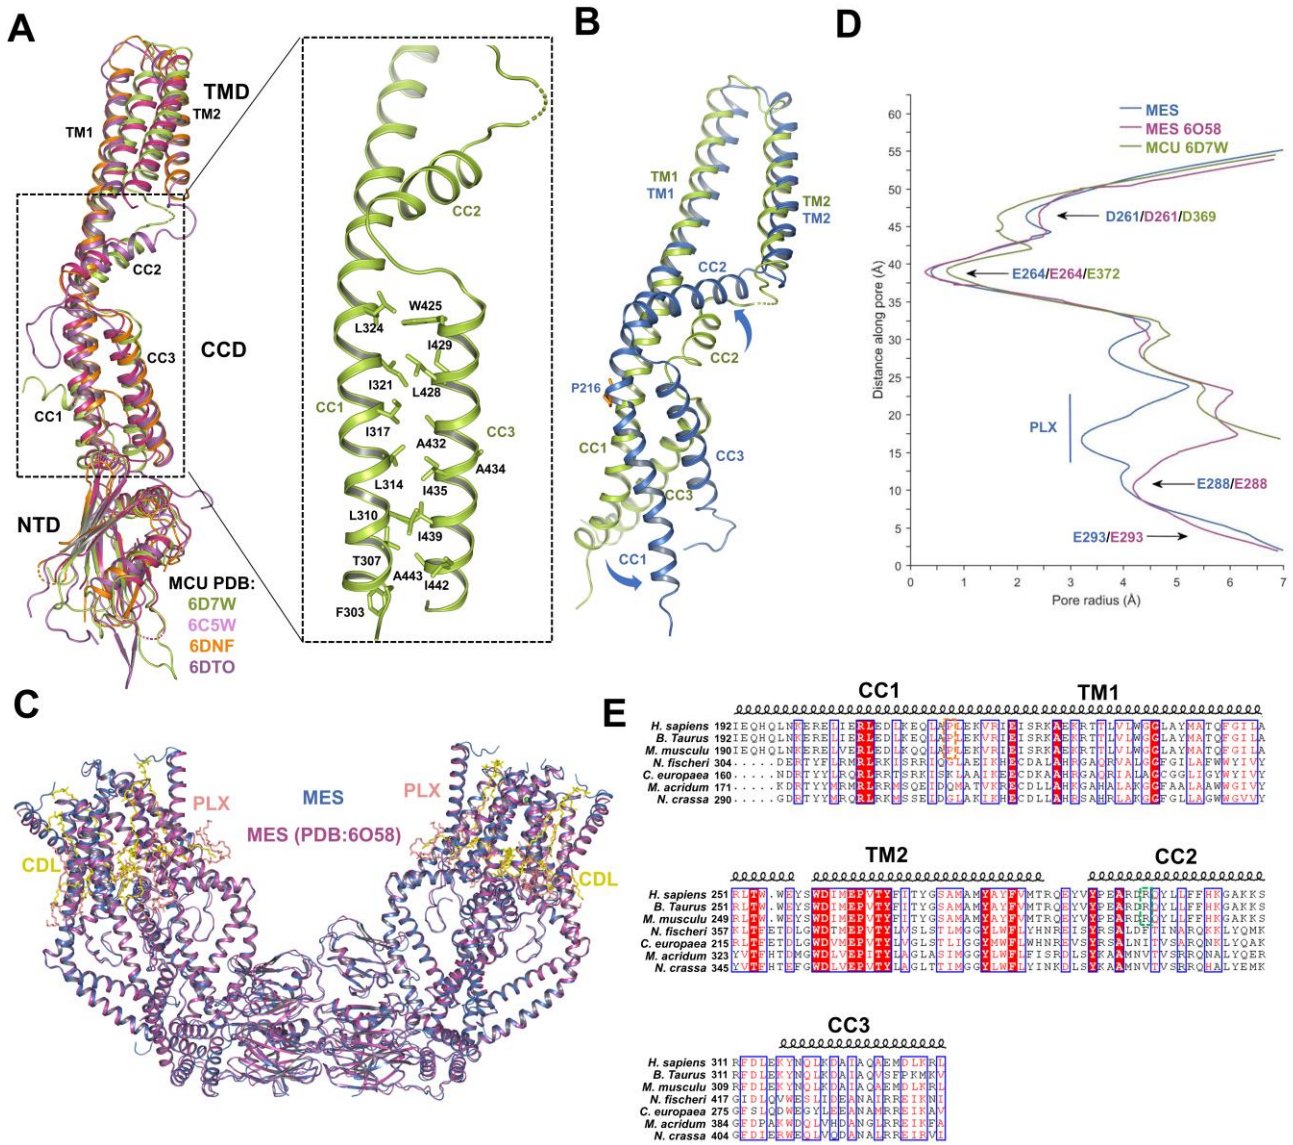

**Fig. S10. Comparison between two human MES and fungi MCU structures.**

(A) Superimposition of four fungal MCU structures (PDB 6D7W colored limon, 6C5W colored magenta, 6DNF colored orange, and 6DTO colored hot-pink). TM1 and TM2 in the transmembrane domain (TMD), cc1, cc2 and cc3 in coiled-coil domain (CCD), and NTD domain are indicated. The black dashed box shows that the interactions in CCD are conserved. The enlarged black dashed box shows the hydrophobic interactions within cc1 and cc3. (B) Alignment of *N. fischeri* MCU TMD+CCD domain (PDB 6D7W, colored limon) and *H. sapiens* MCU TMD+CCD domain (colored blue) based on TMD. TM1, TM2, cc1, cc2, and cc3 helices are indicated. The blue arrows indicate the rotate directions of *H. sapiens* cc1, cc2, compared to *N. fischeri* cc1, cc2, respectively. Pro<sup>216</sup> in *H. sapiens* cc1 is shown in sticks. (C) Superimposition of MES structure (colored blue) and MCU+EMRE

structure (PDB 6O58) (colored purple). PLX and CDL are colored salmon and yellow, respectively. (D) Pore radius along the ion conduction pathway of the indicated MES or MCU structure. The gate residues and PLX are labeled. (E) The amino acid sequences of *H. sapiens*, *B. taurus*, *M. musculus*, *N. fischeri*, *C. europae*, *M. acridum* and *N. crassa* TMD+CCD are aligned and colored according to the ClustalW convention (Uniprot accession numbers: Q9H4I9, Q2M2S2, Q9DB10, A1CWT6, W2SDE2, E9DVV4 and Q7S4I4, respectively). Secondary structure represented by ribbons is based on the cryo-EM structure of *H. sapiens* TMD+CCD. The orange and green dashed boxes indicate the conserved Pro in cc1 and Arg in cc2 of higher eukaryotes, respectively.

**Table S1. Cryo-EM data collection, refinement and validation statistics**

|                                                     | MCU-EMRE<br>supercomplex | MCU-EMRE-MICU1-<br>MICU2 supercomplex |
|-----------------------------------------------------|--------------------------|---------------------------------------|
| <b>Data collection and processing</b>               |                          |                                       |
| Magnification                                       | 105,000                  | 105,000                               |
| Voltage (kV)                                        | 300                      | 300                                   |
| Electron exposure (e <sup>-</sup> /Å <sup>2</sup> ) | 50                       | 50                                    |
| Defocus range (μm)                                  | -1.5 ~ -2.0              | -1.5 ~ -2.0                           |
| Pixel size (Å)                                      | 1.091                    | 1.091                                 |
| Software                                            | RELION-3.0               | RELION-3.0                            |
| Symmetry imposed                                    | C2                       | C2                                    |
| Initial particle images (no.)                       | 471,401                  | 986,805                               |
| Final particles images (no.)                        | 46,879 / 179,468*        | 33,930 / 45,864 /<br>91,728**         |
| Map resolution (Å)                                  | 3.27 / 3.27*             | 3.71 / 3.39 / 3.30**                  |
| FSC threshold                                       | 0.143                    | 0.143                                 |
| Map sharpening <i>B</i> factor                      | -93 / -106*              | -113 / -92 / -96**                    |
| Local map resolution range (Å)                      | 4.5-3.0 / 4.5-3.0*       | 5.0-3.5 / 4.5-3.0 / 4.5-3.0**         |
| <b>Refinement</b>                                   |                          |                                       |
| Software                                            | PHENIX 1.14              | PHENIX 1.15                           |
| Initial model used (PDB code)                       | -                        | 4NSC / 6AGH                           |
| Model resolution (Å)                                | 3.3                      | 3.4                                   |
| FSC threshold                                       | 0.5                      | 0.5                                   |
| Model composition                                   |                          |                                       |
| Non-hydrogen atoms                                  | 22932                    | 32954                                 |
| Protein residues                                    | 2622                     | 3872                                  |
| Ligand                                              | 24                       | 24                                    |
| B factors (Å <sup>2</sup> )                         |                          |                                       |
| Protein                                             | 72.80                    | 55.37                                 |
| Ligand                                              | 75.56                    | 54.94                                 |
| R.m.s deviations                                    |                          |                                       |
| Bond length (Å)                                     | 0.005                    | 0.003                                 |
| Bond angles (°)                                     | 0.745                    | 0.527                                 |
| Validation                                          |                          |                                       |
| MolProbity score                                    | 1.42                     | 1.68                                  |
| Clashscore                                          | 3.16                     | 6.72                                  |
| Poor rotamers (%)                                   | 0.00                     | 0.09                                  |
| Ramachandran plot                                   |                          |                                       |
| Favored (%)                                         | 95.52                    | 95.49                                 |
| Allowed (%)                                         | 4.48                     | 4.51                                  |
| Disallowed (%)                                      | 0.00                     | 0.00                                  |

\* The values for the density map of MES NTDs and TMD+CCD, respectively.

\*\* The values for the density map of MEMMS MICUs, NTDs and TMD+CCD, respectively.
